# Supplementary material for: Characterization of the prognostic values and response to immunotherapy/chemotherapy of Krüppel‐like factors in prostate cancer
Source: PubMed Central journal article supplement (PMC7214179; doi:10.1111/jcmm.15242), 2020-04-13
Supplement: JCMM-24-5797-s001.pdf [file JCMM-24-5797-s001.pdf]

## ***Supplementary figures and tables***

**Figure S1.** K-M plots to shown the positive RFS difference in high and low level of KLFs.

**Figure S2.** K-M plots to shown the negative RFS difference in high and low level of KLFs.

**Figure S3.** The genetic amplification effect on mRNA expression of KLF5 and KLF12.

**Figure S4.** The pathway enrichment of increased genes in KLF-P and KLF-F groups.

**Table S1.** The clinicopathological information of training and validation cohorts.

**Table S2.** The mRNA expression of KLF family members among normal and tumor tissues.

**Table S3.** The promoter methylation of KLF family members among normal and tumor tissues.

**Table S4.** The coefficient of KLFs and clinical features conducted by the Cox proportional hazard regression analyses.

**Table S5.** The distribution of TIICs among KLF-F and KLF-P group.

**Table S6.** The result of response to immunotherapy based on TIDE algorithm method.

**Figure S1. K-M plots to show the positive RFS difference in high and low level of KLFs**

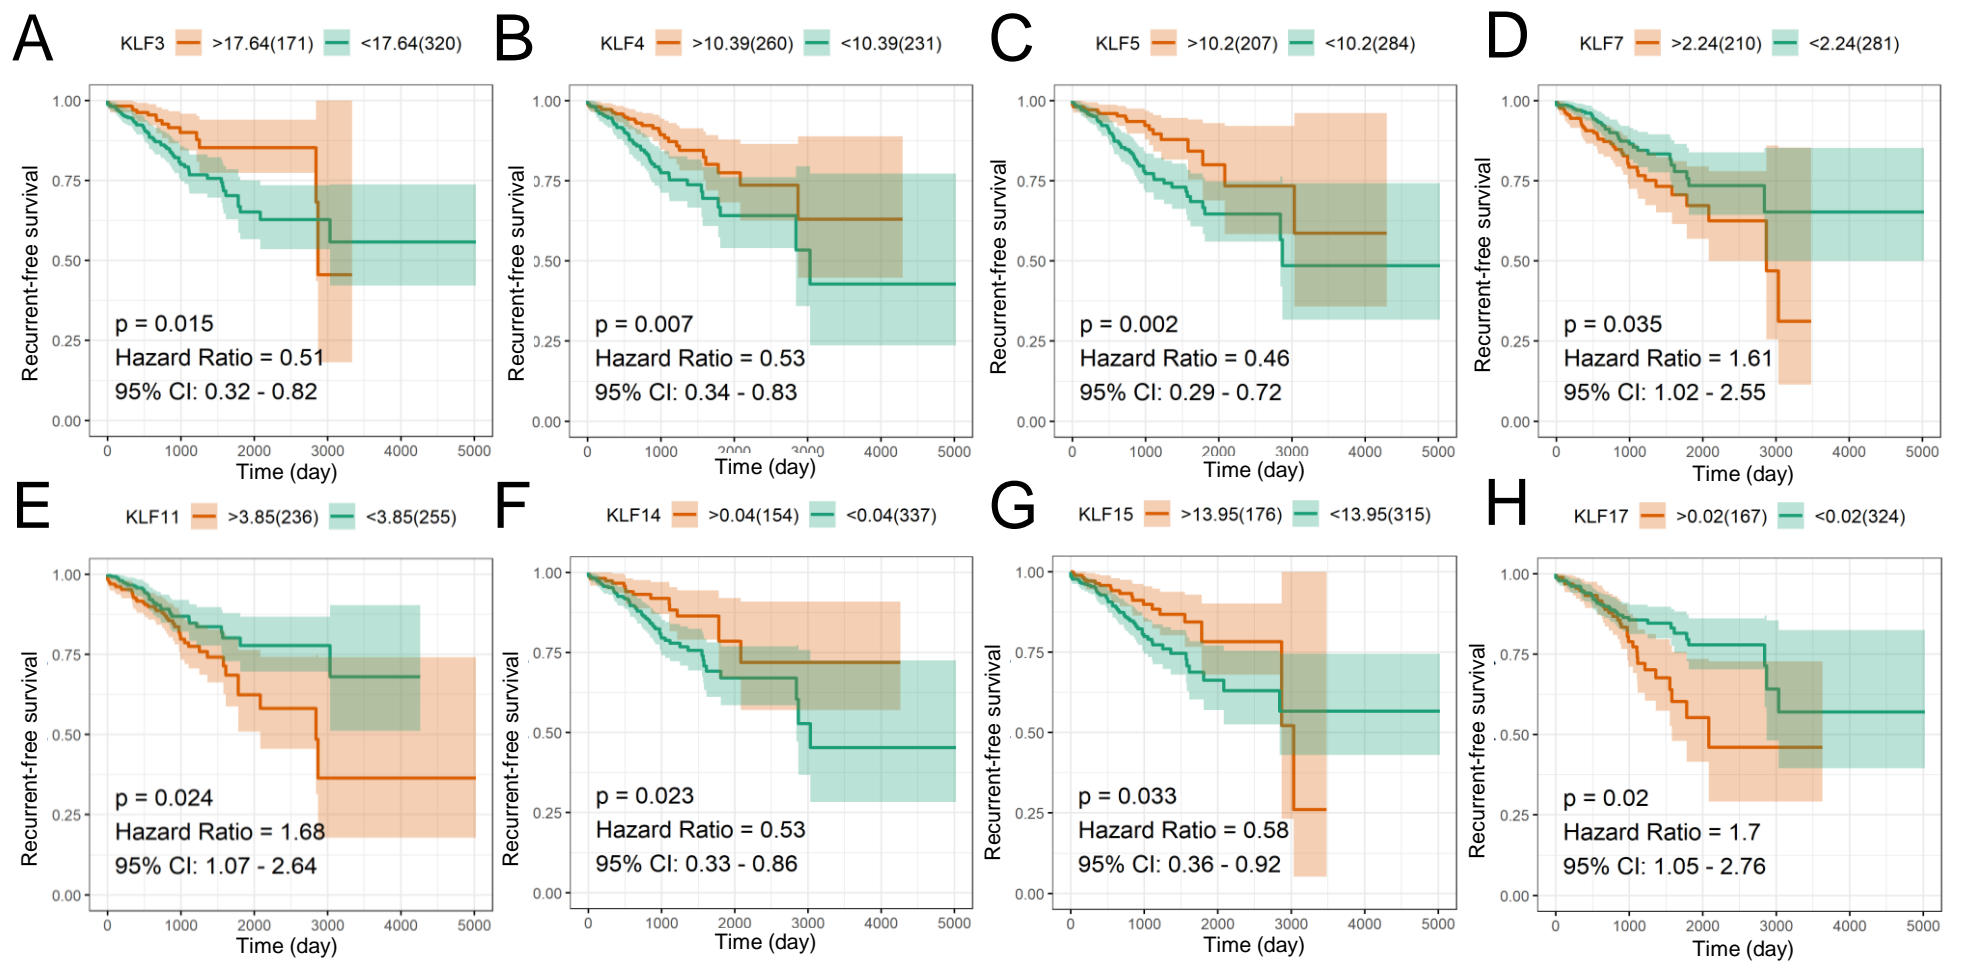

**Figure S2. K-M plots to shown the negative RFS difference in high and low level of KLFs**

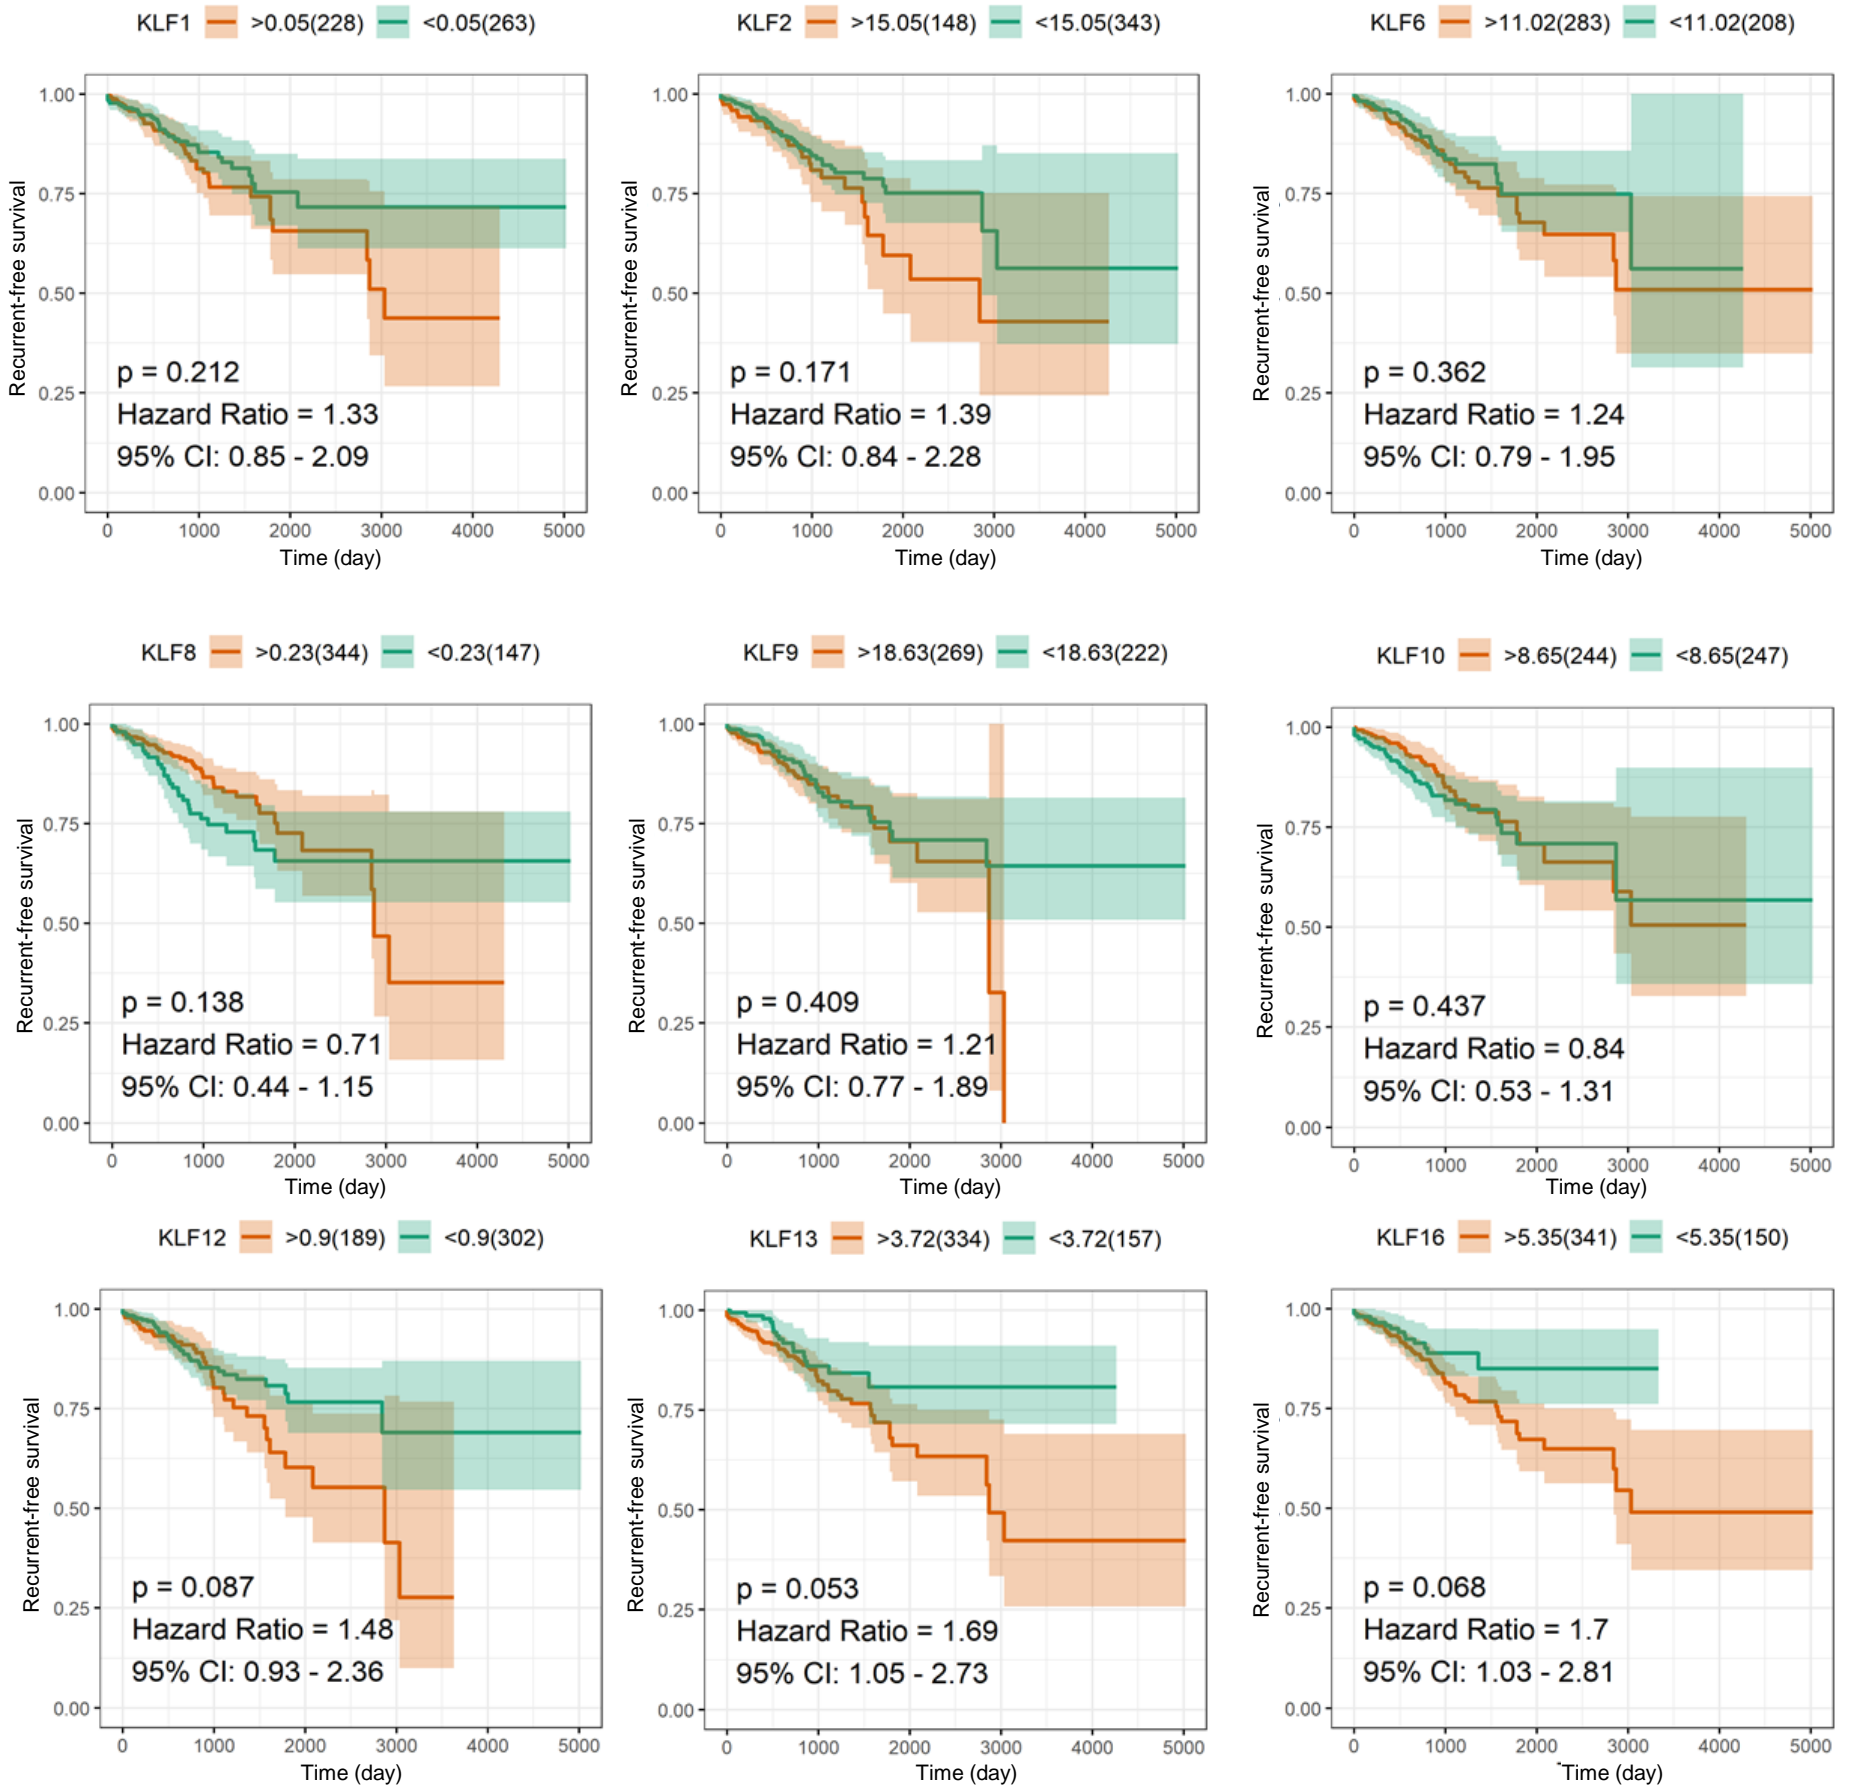

**Figure S3. The genetic amplification effect on mRNA expression of KLF5 and KLF12**

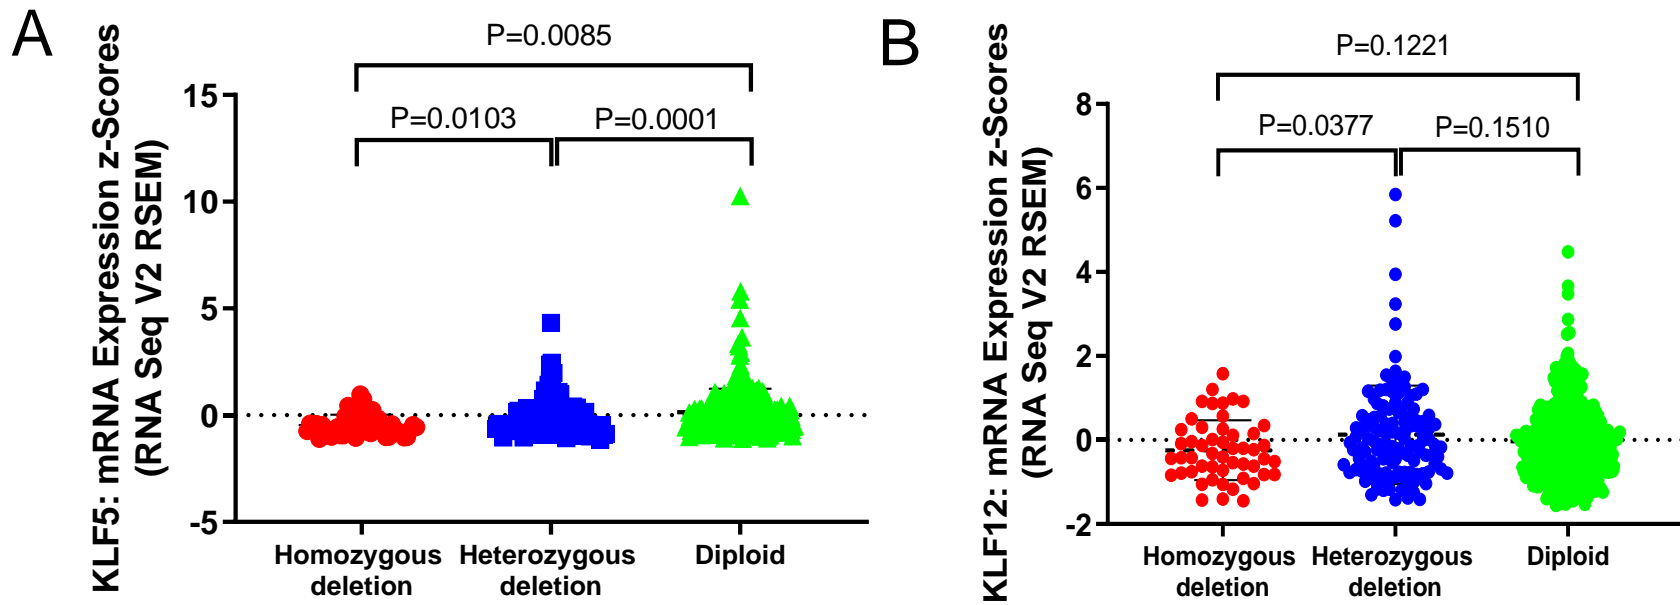

**Figure S4. The pathway enrichment of increased genes in KLF-P and KLF-F groups.**

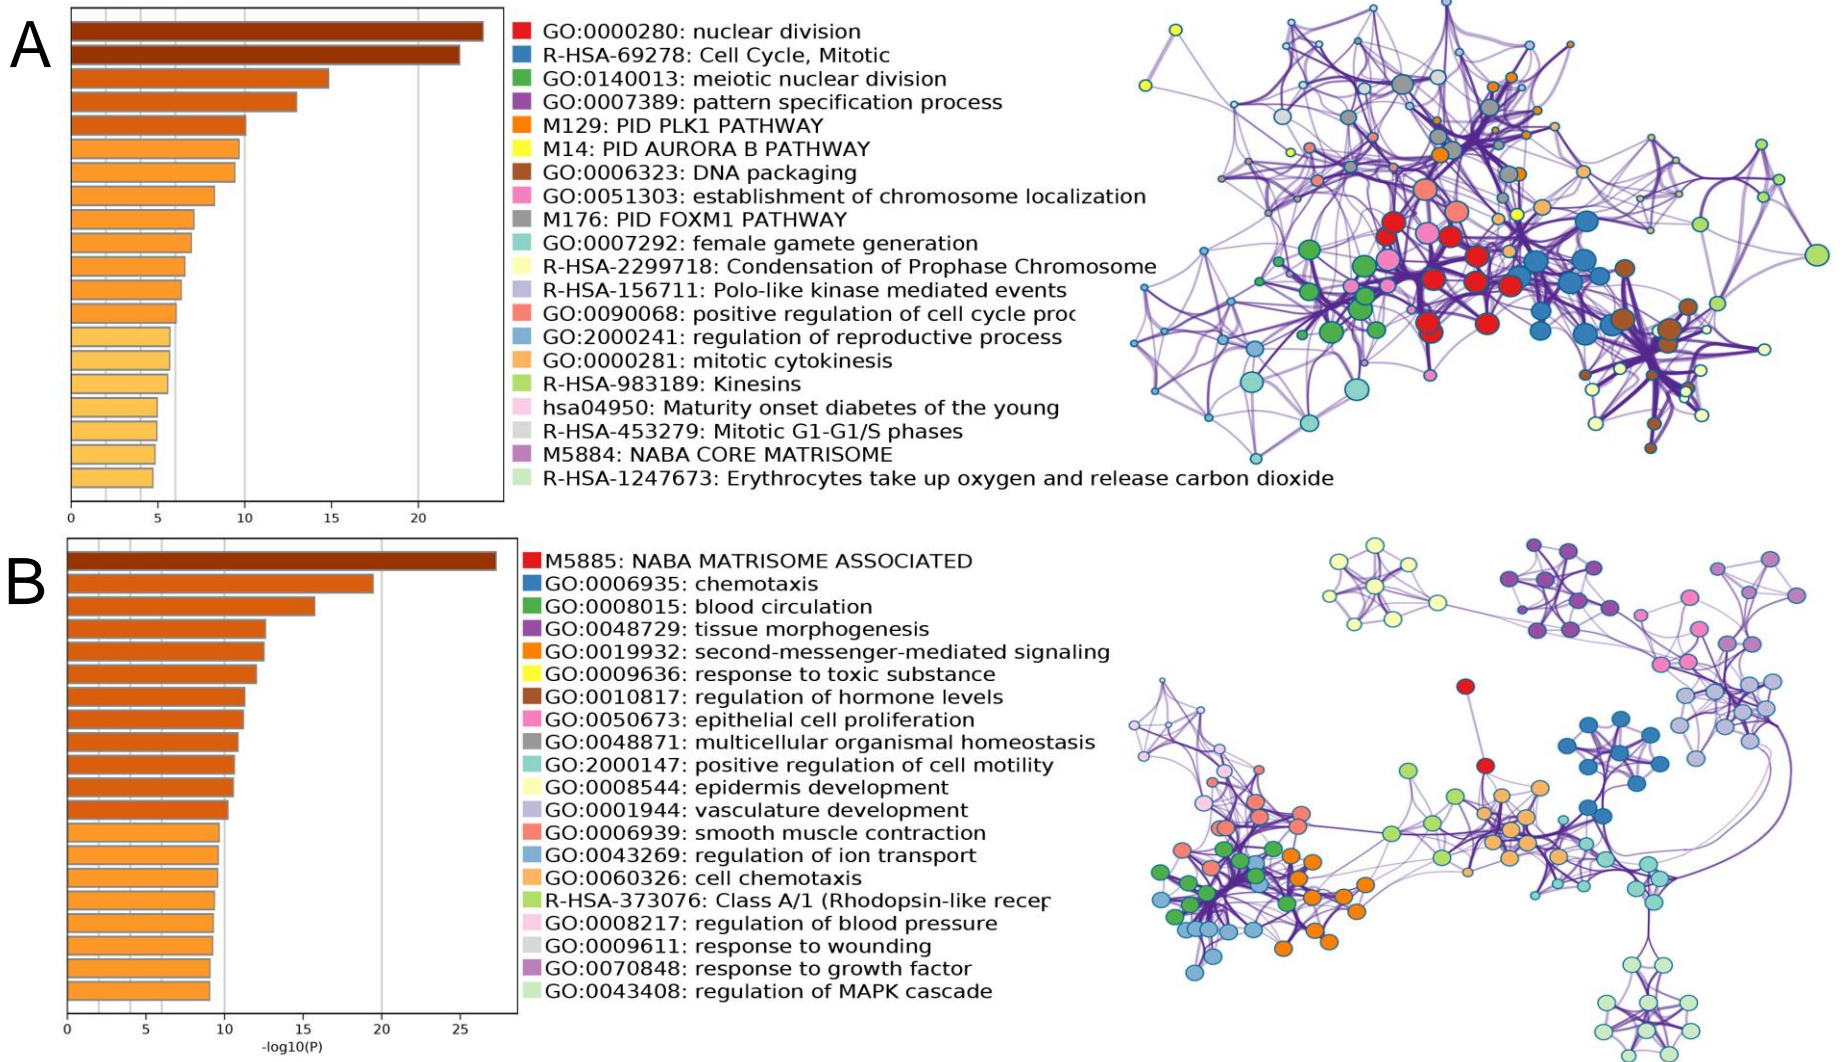

**Table S1. The clinicopathological information of training and validation cohorts.**

|                   | TCGA <sup>1</sup><br>(n=415) | MSKCC <sup>2</sup><br>(n=138) | GSE116918 <sup>3</sup><br>(n=223) |
|-------------------|------------------------------|-------------------------------|-----------------------------------|
| Age               |                              |                               |                                   |
| ≤60               | 177                          | -                             | 31                                |
| >60               | 238                          | -                             | 192                               |
| Gleason score     |                              |                               |                                   |
| ≤7                | 228                          | 117                           | 127                               |
| >7                | 187                          | 21                            | 96                                |
| Pathology T stage |                              |                               |                                   |
| ≤T2               | 143                          | 131                           | 127                               |
| >T2               | 272                          | 7                             | 96                                |
| Pathology N stage |                              |                               |                                   |
| N0                | 338                          | -                             | -                                 |
| N1                | 77                           | -                             | -                                 |
| Recurrent         |                              |                               |                                   |
| Yes               | 71                           | 35                            | 51                                |
| No                | 344                          | 103                           | 172                               |

1. The Cancer Genome Atlas (TCGA) : <https://portal.gdc.cancer.gov/>
2. MSKCC cohort/GSE21032: <https://www.ncbi.nlm.nih.gov/geo/query/acc.cgi?acc=GSE21032>
3. GSE116918: <https://www.ncbi.nlm.nih.gov/geo/query/acc.cgi?acc=GSE116918>

**Table S2. The mRNA expression of KLF family members among normal and tumor tissues.**

| <b>KLFs</b> | <b>Normal<br/>(FPKM, Mean <math>\pm</math> SD)</b> | <b>Tumor<br/>(FPKM, Mean <math>\pm</math> SD)</b> | <b>P value</b> |
|-------------|----------------------------------------------------|---------------------------------------------------|----------------|
| KLF1        | 0.028 $\pm$ 0.041                                  | 0.06 $\pm$ 0.055                                  | <0.001*        |
| KLF2        | 14.363 $\pm$ 10.961                                | 13.517 $\pm$ 8.027                                | 0.446          |
| KLF3        | 17.041 $\pm$ 7.273                                 | 15.901 $\pm$ 7.31                                 | 0.043*         |
| KLF4        | 17.592 $\pm$ 16.149                                | 14.37 $\pm$ 14.284                                | 0.028*         |
| KLF5        | 25.484 $\pm$ 24.403                                | 11.216 $\pm$ 15.427                               | <0.001*        |
| KLF6        | 23.584 $\pm$ 19.86                                 | 17.813 $\pm$ 21.992                               | 0.002*         |
| KLF7        | 3.131 $\pm$ 1.525                                  | 2.195 $\pm$ 0.93                                  | <0.001*        |
| KLF8        | 0.791 $\pm$ 0.382                                  | 0.39 $\pm$ 0.284                                  | <0.001*        |
| KLF9        | 27.46 $\pm$ 11.407                                 | 21.268 $\pm$ 9.114                                | <0.001*        |
| KLF10       | 20.092 $\pm$ 16.828                                | 12.056 $\pm$ 6.895                                | <0.001*        |
| KLF11       | 5.873 $\pm$ 2.204                                  | 3.897 $\pm$ 1.691                                 | <0.001*        |
| KLF12       | 1.299 $\pm$ 0.761                                  | 0.873 $\pm$ 0.396                                 | <0.001*        |
| KLF13       | 6.583 $\pm$ 2.848                                  | 5.571 $\pm$ 3.171                                 | 0.001*         |
| KLF14       | 0.038 $\pm$ 0.034                                  | 0.036 $\pm$ 0.019                                 | 0.875          |
| KLF15       | 9.953 $\pm$ 5.201                                  | 13.095 $\pm$ 6.71                                 | 0.003*         |
| KLF16       | 3.939 $\pm$ 2.054                                  | 7.391 $\pm$ 3.223                                 | <0.001*        |
| KLF17       | 0.046 $\pm$ 0.062                                  | 0.024 $\pm$ 0.03                                  | <0.001*        |

\*, P<0.05

**Table S3. The promoter methylation of KLF family members among normal and tumor tissues.**

| <b>KLFs</b> | <b>Normal<br/>(<math>\beta</math> value, Median, range)</b> | <b>Tumor<br/>(<math>\beta</math> value, Median, range)</b> | <b>P value</b> |
|-------------|-------------------------------------------------------------|------------------------------------------------------------|----------------|
| KLF1        | 0.792 (0.732-0.861)                                         | 0.817 (0.722-0.9)                                          | <0.001*        |
| KLF2        | 0.256 (0.236-0.269)                                         | 0.252 (0.228-0.275)                                        | 0.233          |
| KLF3        | 0.045 (0.034-0.062)                                         | 0.062 (0.029-0.104)                                        | <0.001*        |
| KLF4        | 0.027 (0.022-0.039)                                         | 0.028 (0.016-0.042)                                        | 0.329          |
| KLF5        | 0.037 (0.028-0.048)                                         | 0.035 (0.023-0.048)                                        | 0.002*         |
| KLF6        | 0.107 (0.096-0.12)                                          | 0.112 (0.098-0.126)                                        | <0.001*        |
| KLF7        | 0.048 (0.04-0.063)                                          | 0.061 (0.028-0.133)                                        | <0.001*        |
| KLF8        | 0.317 (0.239-0.521)                                         | 0.711 (0.3-0.925)                                          | <0.001*        |
| KLF9        | 0.07 (0.05-0.101)                                           | 0.073 (0.036-0.133)                                        | 0.175          |
| KLF10       | 0.039 (0.033-0.046)                                         | 0.037 (0.026-0.051)                                        | 0.002*         |
| KLF11       | 0.292 (0.126-0.464)                                         | 0.38 (0.102-0.67)                                          | <0.001*        |
| KLF12       | 0.049 (0.036-0.061)                                         | 0.053 (0.036-0.173)                                        | <0.001*        |
| KLF13       | 0.106 (0.082-0.13)                                          | 0.108 (0.049-0.177)                                        | <0.001*        |
| KLF14       | 0.123 (0.086-0.154)                                         | 0.135 (0.057-0.312)                                        | <0.001*        |
| KLF15       | 0.041 (0.029-0.055)                                         | 0.034 (0.019-0.052)                                        | <0.001*        |
| KLF16       | 0.096 (0.056-0.12)                                          | 0.099 (0.057-0.146)                                        | <0.001*        |
| KLF17       | 0.931 (0.908-0.959)                                         | 0.892 (0.806-0.947)                                        | <0.001*        |

\*, P <0.05

The Beta value indicates level of DNA methylation ranging from 0 (unmethylated) to 1 (fully methylated).



**Table S4. The coefficient of KLFs and clinical features conducted by the Cox proportional hazard regression analyses.**

| <b>Characteristics</b> | <b>Co-ef</b> | <b>Exp(co-ef)</b> | <b>Se (co-ef)</b> | <b>z</b> | <b>Pr (&gt; z )</b> |
|------------------------|--------------|-------------------|-------------------|----------|---------------------|
| Gleason score          | 0.542        | 1.719             | 0.139             | 3.912    | <0.001*             |
| Pathology T stage      | 0.559        | 1.749             | 0.268             | 2.084    | 0.038*              |
| KLF5                   | -0.040       | 0.960             | 0.019             | -2.088   | 0.038*              |
| KLF13                  | 0.077        | 1.080             | 0.036             | 2.127    | 0.033*              |

Co-ef, co-efficient; Exp (co-ef), Expectation (co-ef); Se (co-ef), standard error (co-ef); \*, P < 0.05

**Table S5. The distribution of THICs among KLF-F and KLF-P group.**

| <b>Immune cells</b>           | <b>KLF-F<br/>(Mean ± SD)</b> | <b>KLF-P<br/>(Mean ± SD)</b> | <b>P value</b> |
|-------------------------------|------------------------------|------------------------------|----------------|
| B cells naive                 | 0.053±0.037                  | 0.051±0.037                  | 0.518          |
| Plasma cells                  | 0.134±0.08                   | 0.113±0.08                   | 0.020*         |
| T cells CD8                   | 0.089±0.046                  | 0.092±0.046                  | 0.531          |
| T cells CD4 memory<br>resting | 0.236±0.066                  | 0.233±0.066                  | 0.765          |
| T cells follicular helper     | 0.034±0.027                  | 0.031±0.027                  | 0.227          |
| T cells regulatory (Tregs)    | 0.015±0.021                  | 0.019±0.021                  | 0.070          |
| NK cells activated            | 0.041±0.026                  | 0.044±0.026                  | 0.201          |
| Monocytes                     | 0.015±0.018                  | 0.013±0.018                  | 0.360          |
| Macrophages M0                | 0.067±0.058                  | 0.067±0.058                  | 0.977          |
| Macrophages M1                | 0.069±0.035                  | 0.073±0.035                  | 0.353          |
| Macrophages M2                | 0.084±0.046                  | 0.117±0.046                  | <0.001*        |
| Dendritic cells resting       | 0.033±0.028                  | 0.028±0.028                  | 0.108          |
| Dendritic cells activated     | 0.003±0.007                  | 0.003±0.007                  | 0.878          |
| Mast cells resting            | 0.112±0.06                   | 0.099±0.06                   | 0.024*         |

\* P<0.05

**Table S6. The result of response to immunotherapy based on TIDE algorithm method.**

| Patient      | Response | TIDE | IFNG  | MSI Score | CD274 | CD8   | CTL.flag | Dysfunction | Exclusion | MDSC  | CAF   | TAM M2 |
|--------------|----------|------|-------|-----------|-------|-------|----------|-------------|-----------|-------|-------|--------|
| TCGA-J9-A8CK | FALSE    | 2.3  | -0.76 | 0.31      | -0.32 | -0.32 | FALSE    | 0.72        | 2.3       | 0.09  | 0.26  | 0      |
| TCGA-VP-A87C | FALSE    | 2.19 | 2.24  | 0.17      | 0.86  | 1.74  | TRUE     | 2.19        | -1.37     | -0.14 | 0.04  | -0.1   |
| TCGA-HI-7168 | FALSE    | 2.15 | -0.69 | 0.13      | 0.08  | -0.72 | FALSE    | 0.16        | 2.15      | 0.1   | 0.25  | -0.01  |
| TCGA-HC-7079 | FALSE    | 2.13 | 2.62  | 0.11      | 2.46  | 1.44  | TRUE     | 2.13        | -2.3      | -0.19 | -0.01 | -0.14  |
| TCGA-J9-A8CM | FALSE    | 2.1  | -0.32 | 0.32      | -0.29 | -0.41 | FALSE    | 0.24        | 2.1       | 0.06  | 0.2   | 0.05   |
| TCGA-YL-A8SJ | FALSE    | 2.09 | -1.25 | 0.11      | -0.47 | -0.83 | FALSE    | 0.02        | 2.09      | 0.08  | 0.2   | 0.04   |
| TCGA-ZG-A9MC | FALSE    | 1.98 | 1.67  | 0.09      | 1.14  | 1.07  | TRUE     | 1.98        | -1.1      | -0.1  | 0.06  | -0.12  |
| TCGA-J4-A6G1 | FALSE    | 1.84 | 0.55  | 0.27      | 0.39  | 1.31  | TRUE     | 1.84        | -0.92     | -0.08 | -0.03 | -0.03  |
| TCGA-G9-6361 | FALSE    | 1.84 | -0.7  | 0.43      | -0.17 | -0.36 | FALSE    | -0.17       | 1.84      | 0.06  | 0.17  | 0.05   |
| TCGA-G9-6365 | FALSE    | 1.84 | 0.06  | 0.41      | -0.15 | 0.25  | FALSE    | 0.19        | 1.84      | 0.06  | 0.2   | 0.02   |
| TCGA-KK-A7AV | FALSE    | 1.79 | 1.12  | 0.46      | 0.33  | 1.06  | TRUE     | 1.79        | -1.81     | -0.12 | -0.09 | -0.06  |
| TCGA-KK-A7B2 | FALSE    | 1.77 | 1.14  | 0.49      | 0.2   | 0.98  | TRUE     | 1.77        | -0.37     | -0.04 | 0.03  | -0.05  |
| TCGA-KK-A7B0 | FALSE    | 1.7  | 0.11  | 0.73      | 0.18  | 0.74  | TRUE     | 1.7         | -0.27     | -0.02 | -0.05 | 0.02   |
| TCGA-HC-8266 | FALSE    | 1.66 | 2.24  | 0.19      | 1.24  | 2.18  | TRUE     | 1.66        | -1.94     | -0.13 | -0.04 | -0.11  |
| TCGA-G9-6379 | FALSE    | 1.65 | 0.48  | 0.59      | 0.03  | 0.84  | TRUE     | 1.65        | -0.27     | -0.01 | -0.04 | 0      |
| TCGA-KK-A8I4 | FALSE    | 1.64 | 0.96  | 0.11      | 0.36  | 1.45  | TRUE     | 1.64        | -0.25     | -0.06 | 0.09  | -0.06  |
| TCGA-ZG-A9L2 | FALSE    | 1.62 | 0.3   | 0.31      | -0.03 | 0.25  | FALSE    | 0.88        | 1.62      | 0.02  | 0.23  | 0      |
| TCGA-G9-6347 | FALSE    | 1.57 | 0     | 0.76      | 0.23  | 0.85  | TRUE     | 1.57        | 0.44      | -0.02 | 0.09  | 0      |
| TCGA-TK-A8OK | FALSE    | 1.56 | -0.55 | 0.18      | 0.38  | -0.6  | FALSE    | 0.76        | 1.56      | -0.02 | 0.3   | -0.03  |
| TCGA-ZG-A9NI | FALSE    | 1.53 | -0.69 | 0.62      | -0.2  | -0.58 | FALSE    | 0.31        | 1.53      | 0.05  | 0.16  | 0.03   |
| TCGA-V1-A9Z8 | FALSE    | 1.5  | -0.56 | 0.39      | -0.3  | 0.01  | FALSE    | 0.44        | 1.5       | 0.04  | 0.16  | 0.03   |
| TCGA-EJ-AB20 | FALSE    | 1.48 | -0.12 | 0.37      | 0.29  | 1.23  | FALSE    | 1.17        | 1.48      | 0.02  | 0.2   | 0.01   |
| TCGA-VN-A88I | FALSE    | 1.47 | -1.08 | 0.18      | -0.1  | 0.42  | TRUE     | 1.47        | 1.57      | -0.01 | 0.26  | -0.01  |
| TCGA-J9-A52E | FALSE    | 1.45 | 0.63  | 0.08      | -0.18 | 1.48  | FALSE    | 0.73        | 1.45      | 0.08  | 0.12  | 0.02   |
| TCGA-V1-A8MU | FALSE    | 1.45 | 0.15  | 0.33      | -0.03 | 0.88  | TRUE     | 1.45        | 0.28      | -0.04 | 0.11  | -0.02  |
| TCGA-ZG-A9LU | FALSE    | 1.44 | 0.61  | 0.41      | 0.38  | 0.47  | TRUE     | 1.44        | -0.6      | 0.02  | -0.06 | -0.06  |
| TCGA-XJ-A9DI | FALSE    | 1.43 | 0.89  | 0.17      | 0.54  | 1.29  | TRUE     | 1.43        | -0.36     | -0.06 | 0.07  | -0.07  |
| TCGA-J9-A52C | FALSE    | 1.41 | 0.45  | 0.4       | 0.24  | 0.95  | TRUE     | 1.41        | 0.68      | -0.03 | 0.22  | -0.08  |
| TCGA-ZG-A8QY | FALSE    | 1.41 | -0.39 | 0.69      | 0.34  | -0.98 | FALSE    | 0.09        | 1.41      | 0.08  | 0.1   | 0.03   |
| TCGA-HC-A6AS | FALSE    | 1.41 | 0.2   | 0.82      | 0.15  | 0.46  | TRUE     | 1.41        | 0.04      | -0.03 | 0.06  | -0.03  |
| TCGA-ZG-A9L4 | FALSE    | 1.41 | 0.02  | 0.32      | -0.26 | -0.08 | FALSE    | 0.29        | 1.41      | 0.05  | 0.21  | -0.04  |
| TCGA-J4-A67M | FALSE    | 1.4  | -0.31 | 0.73      | -0.04 | 0.78  | TRUE     | 1.4         | 0.24      | -0.02 | 0.04  | 0.01   |
| TCGA-QU-A6IM | FALSE    | 1.4  | 0.74  | 0.86      | 1.04  | 1.75  | TRUE     | 1.4         | -0.64     | 0     | -0.1  | 0      |
| TCGA-HC-7745 | FALSE    | 1.38 | 0.85  | 0.19      | 0.25  | 0.61  | TRUE     | 1.38        | -0.26     | -0.1  | 0.12  | -0.05  |
| TCGA-ZG-A9L9 | FALSE    | 1.37 | 1.04  | 0.42      | 0.13  | 0.54  | FALSE    | 0.6         | 1.37      | 0.04  | 0.17  | -0.01  |
| TCGA-HC-A6HX | FALSE    | 1.36 | -0.86 | 0.71      | 0.37  | 0.29  | TRUE     | 1.36        | 0.35      | 0.04  | -0.01 | 0.02   |
| TCGA-EJ-5525 | FALSE    | 1.35 | -0.35 | 0.11      | -0.17 | -1.02 | FALSE    | -1.18       | 1.35      | 0.06  | 0.11  | 0.04   |
| TCGA-V1-A9Z7 | FALSE    | 1.34 | 0.17  | 0.4       | 0.19  | -0.1  | FALSE    | 0.02        | 1.34      | 0.03  | 0.12  | 0.05   |
| TCGA-FC-7961 | FALSE    | 1.34 | -0.35 | 0.37      | 0.08  | -0.05 | FALSE    | -0.76       | 1.34      | 0.04  | 0.14  | 0.01   |
| TCGA-HC-8264 | FALSE    | 1.31 | 0.1   | 0.4       | 0.47  | -0.64 | FALSE    | -0.22       | 1.31      | -0.03 | 0.22  | 0.01   |
| TCGA-V1-A9OX | FALSE    | 1.3  | -0.3  | 0.57      | -0.05 | 0.56  | TRUE     | 1.3         | -0.59     | -0.03 | -0.06 | -0.01  |
| TCGA-KC-A7FE | FALSE    | 1.3  | -0.58 | 0.4       | 0.06  | -0.56 | FALSE    | 0.78        | 1.3       | -0.01 | 0.2   | 0.01   |
| TCGA-QU-A6IO | FALSE    | 1.3  | -0.39 | 0.86      | 0.23  | 0.62  | TRUE     | 1.3         | -0.55     | 0     | -0.12 | 0.03   |
| TCGA-V1-A9O9 | FALSE    | 1.28 | 1.99  | 0.25      | 0.03  | 1.12  | TRUE     | 1.28        | -1.73     | -0.08 | -0.11 | -0.07  |
| TCGA-G9-7523 | FALSE    | 1.27 | 0.36  | 0.29      | 0.4   | 0.65  | FALSE    | 0.95        | 1.27      | -0.05 | 0.27  | -0.02  |
| TCGA-HC-7742 | FALSE    | 1.26 | -0.12 | 0.31      | -0.31 | -0.28 | FALSE    | -0.43       | 1.26      | 0.05  | 0.14  | 0.01   |
| TCGA-XQ-A8TB | FALSE    | 1.25 | -0.17 | 0.28      | -0.24 | -0.15 | FALSE    | -0.21       | 1.25      | 0.03  | 0.17  | -0.01  |
| TCGA-HI-7170 | FALSE    | 1.24 | 0.22  | 0.35      | 0.15  | 0.28  | TRUE     | 1.24        | 0.86      | 0     | 0.22  | -0.08  |
| TCGA-ZG-A9LN | FALSE    | 1.24 | 2.47  | 0.46      | 0.7   | 2.21  | TRUE     | 1.24        | -0.5      | -0.05 | 0.05  | -0.08  |
| TCGA-ZG-A9L1 | FALSE    | 1.23 | -1.26 | 0.45      | -0.68 | -0.74 | FALSE    | -0.41       | 1.23      | 0.07  | 0.11  | 0.01   |
| TCGA-YL-A8SB | FALSE    | 1.22 | -1    | 0.38      | -0.31 | -0.27 | FALSE    | 0.38        | 1.22      | 0     | 0.15  | 0.04   |
| TCGA-EJ-7328 | FALSE    | 1.22 | 0.83  | 0.21      | 0.2   | 0.81  | TRUE     | 1.22        | -0.58     | -0.07 | 0.04  | -0.05  |
| TCGA-YL-A9WX | FALSE    | 1.21 | -0.3  | 0.24      | 0     | 0.48  | TRUE     | 1.21        | -0.67     | -0.08 | 0.09  | -0.1   |
| TCGA-HI-7169 | FALSE    | 1.21 | -1.12 | 0.5       | 0.24  | 0.31  | TRUE     | 1.21        | 0.65      | -0.01 | 0.11  | 0      |
| TCGA-YL-A8SK | FALSE    | 1.2  | 0.29  | 0.32      | 0.17  | 0.78  | TRUE     | 1.2         | -0.05     | -0.01 | 0.08  | -0.07  |
| TCGA-VP-A879 | FALSE    | 1.19 | -1.23 | 0.37      | -0.56 | -0.09 | FALSE    | 0.71        | 1.19      | 0     | 0.15  | 0.03   |
| TCGA-VP-A87E | FALSE    | 1.19 | 0.98  | 0.57      | 0.33  | 1.04  | TRUE     | 1.19        | -0.81     | -0.09 | 0.09  | -0.11  |
| TCGA-4L-AA1F | FALSE    | 1.17 | 1.58  | 0.03      | 0.36  | 0.29  | TRUE     | 1.17        | 0.8       | -0.08 | 0.29  | -0.08  |
| TCGA-VN-A88L | FALSE    | 1.16 | -0.41 | 0.35      | -0.27 | -0.19 | FALSE    | -0.12       | 1.16      | 0.05  | 0.13  | 0      |
| TCGA-V1-A9OH | FALSE    | 1.12 | -0.13 | 0.59      | -0.16 | -0.08 | FALSE    | -0.27       | 1.12      | 0.06  | 0.06  | 0.05   |
| TCGA-HC-A9TE | FALSE    | 1.12 | 0.91  | 0.09      | 0.31  | 0.46  | TRUE     | 1.12        | -0.94     | -0.1  | -0.02 | -0.03  |
| TCGA-EJ-8474 | FALSE    | 1.12 | -0.4  | 0.57      | -0.23 | -0.46 | FALSE    | -1.13       | 1.12      | 0.05  | 0.08  | 0.04   |
| TCGA-G9-6356 | FALSE    | 1.12 | 0.97  | 0.28      | 0.15  | 1.04  | TRUE     | 1.12        | 0.3       | -0.01 | 0.11  | -0.04  |
| TCGA-HC-7750 | FALSE    | 1.11 | -0.97 | 0.56      | -0.23 | -0.43 | FALSE    | 0.5         | 1.11      | 0.01  | 0.14  | 0.03   |
| TCGA-2A-A8VV | FALSE    | 1.1  | -0.9  | 0.54      | -0.37 | -0.45 | FALSE    | -0.96       | 1.1       | 0.09  | -0.01 | 0.09   |
| TCGA-YL-A8HJ | FALSE    | 1.09 | 0.32  | 0.21      | 0.18  | 0.55  | TRUE     | 1.09        | 0.6       | -0.06 | 0.2   | -0.03  |
| TCGA-KK-A8I7 | FALSE    | 1.09 | 0.25  | 0.26      | -0.03 | 0.08  | TRUE     | 1.09        | -0.24     | -0.06 | 0.04  | -0.01  |

| Patient      | Response | TIDE | IFNG  | MSI Score | CD274 | CD8   | CTL.flag | Dysfunction | Exclusion | MDSC  | CAF   | TAM M2 |
|--------------|----------|------|-------|-----------|-------|-------|----------|-------------|-----------|-------|-------|--------|
| TCGA-J4-A83K | FALSE    | 1.08 | -0.87 | 0.48      | -0.32 | -0.43 | FALSE    | -0.01       | 1.08      | 0.03  | 0.09  | 0.05   |
| TCGA-V1-A9OA | FALSE    | 1.07 | 0.06  | 0.23      | -0.04 | 0.02  | FALSE    | 0.76        | 1.07      | 0.02  | 0.14  | 0      |
| TCGA-KK-A7B3 | FALSE    | 1.06 | 0.49  | 0.2       | -0.03 | 0.49  | TRUE     | 1.06        | 0.09      | -0.04 | 0.04  | 0.01   |
| TCGA-KK-A7AW | FALSE    | 1.06 | 1     | 0.84      | 0.37  | 0.92  | TRUE     | 1.06        | -0.68     | 0.01  | -0.14 | 0.02   |
| TCGA-EJ-7791 | FALSE    | 1.06 | -0.21 | 0.28      | 0     | -0.21 | FALSE    | 0.75        | 1.06      | -0.04 | 0.24  | -0.03  |
| TCGA-G9-6498 | FALSE    | 1.05 | 0.02  | 0.36      | 0.94  | 1.14  | TRUE     | 1.05        | -0.38     | -0.03 | 0.04  | -0.06  |
| TCGA-H9-A6BY | FALSE    | 1.04 | -1.13 | 0.91      | -0.13 | 0.01  | FALSE    | -0.17       | 1.04      | 0.12  | -0.09 | 0.12   |
| TCGA-KC-A4BL | FALSE    | 1.04 | 0.04  | 0.31      | 0.06  | 0.15  | TRUE     | 1.04        | 0.05      | -0.01 | 0.09  | -0.06  |
| TCGA-KK-A7B1 | FALSE    | 1.03 | -0.8  | 0.26      | -0.3  | -0.47 | FALSE    | 0.15        | 1.03      | 0.05  | 0.11  | 0      |
| TCGA-M7-A723 | FALSE    | 1.02 | 1.77  | 0.69      | 0.5   | 1.19  | TRUE     | 1.02        | -0.08     | -0.07 | 0.08  | -0.03  |
| TCGA-G9-6364 | FALSE    | 1.02 | 0.37  | 0.27      | -0.23 | 0.24  | FALSE    | -0.08       | 1.02      | -0.03 | 0.19  | 0.01   |
| TCGA-H9-A6BX | FALSE    | 1.02 | 0.04  | 0.27      | 0.08  | -0.15 | FALSE    | 1.33        | 1.02      | -0.03 | 0.22  | -0.02  |
| TCGA-V1-A9Z9 | FALSE    | 1.02 | -0.27 | 0.49      | -0.02 | -0.39 | FALSE    | 0.31        | 1.02      | 0.02  | 0.1   | 0.03   |
| TCGA-KK-A6E6 | FALSE    | 1.02 | 0.46  | 0.49      | -0.27 | 0.48  | FALSE    | -0.35       | 1.02      | 0.02  | 0.15  | -0.02  |
| TCGA-G9-6378 | FALSE    | 1.01 | 0.07  | 0.52      | 0.12  | -0.26 | FALSE    | 0.37        | 1.01      | -0.01 | 0.16  | 0.01   |
| TCGA-KK-A6E3 | FALSE    | 1    | 0.69  | 0.86      | 0.24  | 0.33  | TRUE     | 1           | 0.23      | -0.02 | 0.04  | 0.01   |
| TCGA-V1-A8ML | FALSE    | 0.99 | -0.27 | 0.71      | 0.31  | -0.19 | FALSE    | -0.2        | 0.99      | 0.05  | 0.07  | 0.03   |
| TCGA-HC-7737 | FALSE    | 0.98 | 0.34  | 0.37      | 0.11  | 0.73  | TRUE     | 0.98        | -0.78     | -0.1  | 0.09  | -0.1   |
| TCGA-HC-A76W | FALSE    | 0.97 | -0.2  | 0.2       | 0.07  | -0.6  | FALSE    | 0.57        | 0.97      | 0.02  | 0.16  | -0.02  |
| TCGA-EJ-AB27 | FALSE    | 0.97 | 0.64  | 0.67      | 0.06  | 0.29  | TRUE     | 0.97        | -0.95     | -0.05 | -0.05 | -0.04  |
| TCGA-YL-A9WY | FALSE    | 0.96 | 1.25  | 0.14      | 0.08  | 0.58  | TRUE     | 0.96        | -0.14     | -0.05 | 0.09  | -0.05  |
| TCGA-CH-5754 | FALSE    | 0.96 | 2.67  | 0.15      | 0.7   | 1.11  | TRUE     | 0.96        | -1.06     | 0.02  | -0.09 | -0.09  |
| TCGA-G9-7525 | FALSE    | 0.96 | -0.83 | 0.71      | -0.12 | -0.31 | FALSE    | -0.03       | 0.96      | 0.02  | 0.07  | 0.06   |
| TCGA-KC-A4BR | FALSE    | 0.96 | -0.55 | 0.4       | 0.8   | -0.4  | FALSE    | 0.99        | 0.96      | 0.01  | 0.22  | -0.08  |
| TCGA-V1-A8MF | FALSE    | 0.95 | 0.53  | 0.7       | 0.27  | 0.88  | TRUE     | 0.95        | -1.45     | -0.09 | -0.09 | -0.03  |
| TCGA-CH-5745 | FALSE    | 0.94 | 0.5   | 0.39      | 0.26  | 0.36  | TRUE     | 0.94        | -0.69     | -0.11 | 0.1   | -0.09  |
| TCGA-J4-8198 | FALSE    | 0.93 | -0.43 | 0.33      | -0.01 | -0.58 | FALSE    | -0.67       | 0.93      | 0     | 0.09  | 0.05   |
| TCGA-XK-AAJU | FALSE    | 0.93 | -0.44 | 0.48      | 0.02  | 0.53  | TRUE     | 0.93        | -0.47     | -0.03 | -0.02 | -0.02  |
| TCGA-J4-A67S | FALSE    | 0.93 | 0.07  | 0.8       | 0.01  | 0.75  | TRUE     | 0.93        | -0.42     | 0.03  | -0.12 | 0.01   |
| TCGA-KK-A8IL | FALSE    | 0.92 | 1.65  | 0.38      | 0.54  | 1.06  | TRUE     | 0.92        | -1.34     | -0.05 | -0.01 | -0.13  |
| TCGA-FC-A8O0 | FALSE    | 0.92 | -1.11 | 0.51      | 0.63  | -1.23 | FALSE    | 0.33        | 0.92      | 0.03  | 0.07  | 0.04   |
| TCGA-HC-A6AP | FALSE    | 0.92 | -0.3  | 0.79      | 0.15  | 0.2   | TRUE     | 0.92        | 0.26      | 0.01  | -0.02 | 0.04   |
| TCGA-G9-6353 | FALSE    | 0.91 | -1.16 | 0.56      | -0.36 | -0.14 | FALSE    | 0.9         | 0.91      | 0     | 0.1   | 0.03   |
| TCGA-V1-A9ZG | FALSE    | 0.91 | -0.58 | 0.28      | -0.03 | -0.62 | FALSE    | 0.3         | 0.91      | 0.02  | 0.12  | 0      |
| TCGA-EJ-7788 | FALSE    | 0.9  | -0.18 | 0.34      | -0.3  | -0.33 | FALSE    | -0.8        | 0.9       | 0     | 0.1   | 0.04   |
| TCGA-EJ-5504 | FALSE    | 0.89 | 0.31  | 0.45      | 0.03  | -0.42 | FALSE    | -0.83       | 0.89      | -0.01 | 0.14  | 0.01   |
| TCGA-G9-6329 | FALSE    | 0.89 | 0.41  | 0.39      | 0.01  | 0.75  | TRUE     | 0.89        | 0.75      | 0.03  | 0.08  | 0      |
| TCGA-EJ-A8FU | FALSE    | 0.88 | 0.16  | 0.41      | 0.03  | 0.05  | FALSE    | 1.13        | 0.88      | -0.02 | 0.2   | -0.04  |
| TCGA-J4-A6M7 | FALSE    | 0.86 | -1.09 | 0.52      | -0.33 | -0.51 | FALSE    | -1.07       | 0.86      | 0.05  | 0.02  | 0.06   |
| TCGA-TP-A8TT | FALSE    | 0.85 | 2.74  | 0.41      | 0.63  | 1.68  | TRUE     | 0.85        | -1.37     | -0.13 | 0.01  | -0.09  |
| TCGA-EJ-7327 | FALSE    | 0.85 | 0.27  | 0.17      | -0.33 | -0.23 | FALSE    | 0.11        | 0.85      | 0     | 0.14  | 0      |
| TCGA-KC-A4BV | FALSE    | 0.83 | 1.28  | 0.33      | -0.09 | 0.61  | FALSE    | 0.36        | 0.83      | 0     | 0.12  | 0      |
| TCGA-EJ-7315 | FALSE    | 0.82 | 0.68  | 0.18      | -0.23 | 1.03  | TRUE     | 0.82        | -0.18     | -0.06 | 0.06  | -0.02  |
| TCGA-G9-6385 | FALSE    | 0.82 | -0.48 | 0.56      | -0.09 | -0.2  | FALSE    | 0.5         | 0.82      | 0     | 0.13  | 0      |
| TCGA-J9-A8CL | FALSE    | 0.82 | 0.67  | 0.35      | 0.08  | -0.27 | FALSE    | 0.37        | 0.82      | 0     | 0.14  | -0.01  |
| TCGA-KK-A59V | FALSE    | 0.82 | 2.63  | 0.69      | 0.85  | 3.15  | TRUE     | 0.82        | -1.83     | -0.03 | -0.2  | -0.06  |
| TCGA-J4-A67N | FALSE    | 0.81 | 0.17  | 0.73      | 0.99  | 1.18  | TRUE     | 0.81        | -0.61     | 0     | -0.11 | 0.02   |
| TCGA-CH-5743 | FALSE    | 0.81 | 0.51  | 0.46      | 0.51  | 1.39  | TRUE     | 0.81        | -1.33     | -0.08 | 0     | -0.11  |
| TCGA-V1-A9OT | FALSE    | 0.8  | -1    | 0.3       | -0.1  | 1.51  | TRUE     | 0.8         | -0.11     | 0.02  | -0.08 | 0.04   |
| TCGA-J4-A6G3 | FALSE    | 0.8  | 1.01  | 0.25      | 0.33  | 0.93  | TRUE     | 0.8         | -0.76     | 0     | 0     | -0.1   |
| TCGA-X4-A8KS | FALSE    | 0.8  | -0.49 | 0.53      | 0.17  | 0.63  | TRUE     | 0.8         | -0.53     | -0.02 | -0.08 | 0.01   |
| TCGA-YL-A8SO | FALSE    | 0.79 | -0.96 | 0.34      | -0.31 | -0.51 | FALSE    | 0.21        | 0.79      | 0.07  | 0.01  | 0.04   |
| TCGA-EJ-A7NM | FALSE    | 0.79 | 1.07  | 0.26      | -0.34 | 1.05  | TRUE     | 0.79        | 0.03      | 0.03  | -0.05 | 0.02   |
| TCGA-HC-7747 | FALSE    | 0.77 | 1.28  | 0.62      | 0.41  | 0.79  | TRUE     | 0.77        | -0.78     | -0.06 | -0.02 | -0.04  |
| TCGA-EJ-7318 | FALSE    | 0.77 | 0.96  | 0.76      | -0.02 | 0.08  | TRUE     | 0.77        | 0.14      | 0.03  | -0.04 | 0.02   |
| TCGA-EJ-5501 | FALSE    | 0.76 | -0.06 | 0.37      | 0.02  | 0.04  | FALSE    | 0.38        | 0.76      | 0.06  | 0.06  | -0.01  |
| TCGA-HC-7210 | FALSE    | 0.76 | 0.76  | 0.32      | 0.75  | 0.48  | TRUE     | 0.76        | -0.45     | -0.12 | 0.14  | -0.08  |
| TCGA-EJ-A7NG | FALSE    | 0.76 | -0.89 | 0.4       | -0.27 | -0.54 | FALSE    | 0.75        | 0.76      | -0.02 | 0.18  | -0.04  |
| TCGA-G9-7509 | FALSE    | 0.75 | -0.73 | 0.55      | -0.22 | -0.24 | FALSE    | -0.55       | 0.75      | 0.01  | 0.06  | 0.04   |
| TCGA-J4-A67Q | FALSE    | 0.72 | -0.39 | 0.62      | -0.06 | -0.15 | FALSE    | 1.28        | 0.72      | 0     | 0.09  | 0.01   |
| TCGA-CH-5769 | FALSE    | 0.72 | 0.51  | 0.54      | -0.13 | -0.24 | FALSE    | -0.86       | 0.72      | 0.11  | 0.04  | -0.04  |
| TCGA-XK-AAIV | FALSE    | 0.71 | 1.54  | 0.22      | 0.66  | 1.26  | TRUE     | 0.71        | -0.93     | -0.05 | -0.03 | -0.06  |
| TCGA-EJ-A7NJ | FALSE    | 0.68 | 0.83  | 0.72      | 0.08  | 0.69  | TRUE     | 0.68        | -1.29     | -0.08 | -0.07 | -0.04  |
| TCGA-ZG-A9L6 | FALSE    | 0.68 | -0.35 | 0.23      | 0.06  | -0.46 | FALSE    | 1.08        | 0.68      | -0.07 | 0.17  | 0      |
| TCGA-YL-A8SP | FALSE    | 0.67 | -1.19 | 0.32      | -0.28 | -0.44 | FALSE    | -0.86       | 0.67      | 0.09  | -0.05 | 0.06   |
| TCGA-KK-A8IG | FALSE    | 0.67 | -0.13 | 0.43      | -0.01 | 0.1   | FALSE    | 0.37        | 0.67      | -0.03 | 0.14  | -0.01  |
| TCGA-2A-AAJU | FALSE    | 0.67 | -0.67 | 0.51      | -0.53 | -0.23 | FALSE    | -0.74       | 0.67      | 0.03  | 0.02  | 0.04   |
| TCGA-ZG-A8QZ | FALSE    | 0.67 | 0.5   | 0.41      | 0.06  | 0.06  | FALSE    | 0.71        | 0.67      | -0.01 | 0.15  | -0.04  |
| TCGA-FC-7708 | FALSE    | 0.66 | 0.29  | 0.24      | -0.13 | 0.41  | TRUE     | 0.66        | 0.67      | -0.06 | 0.25  | -0.07  |
| TCGA-V1-A8X3 | FALSE    | 0.66 | 0.42  | 0.54      | -0.07 | -0.23 | FALSE    | -0.02       | 0.66      | 0     | 0.12  | -0.01  |

| Patient      | Response | TIDE | IFNG  | MSI Score | CD274 | CD8   | CTL.flag | Dysfunction | Exclusion | MDSC  | CAF   | TAM M2 |
|--------------|----------|------|-------|-----------|-------|-------|----------|-------------|-----------|-------|-------|--------|
| TCGA-ZG-A8QW | FALSE    | 0.66 | 0.94  | 0.49      | 0.29  | 0.5   | TRUE     | 0.66        | -0.11     | 0.02  | 0.01  | -0.04  |
| TCGA-V1-A9ZR | FALSE    | 0.65 | 0.14  | 0.32      | -0.05 | 0.26  | FALSE    | 1.19        | 0.65      | -0.06 | 0.15  | 0.01   |
| TCGA-ZG-A9M4 | FALSE    | 0.65 | 1.32  | 0.33      | 0.81  | 1.55  | TRUE     | 0.65        | -1.25     | -0.05 | -0.11 | -0.02  |
| TCGA-XK-AAJ3 | FALSE    | 0.64 | -0.5  | 0.7       | 0.32  | -0.01 | FALSE    | 0.09        | 0.64      | 0.04  | -0.01 | 0.05   |
| TCGA-M7-A71Y | FALSE    | 0.63 | -0.53 | 0.65      | 0.05  | 0.34  | FALSE    | 0.63        | 0.63      | 0.01  | 0.05  | 0.03   |
| TCGA-KK-A8IC | FALSE    | 0.62 | -0.11 | 0.23      | -0.33 | -0.17 | FALSE    | 0.58        | 0.62      | 0.01  | 0.16  | -0.07  |
| TCGA-J4-A67L | FALSE    | 0.62 | 1.06  | 0.84      | -0.01 | 0.96  | TRUE     | 0.62        | -0.29     | -0.01 | -0.04 | 0      |
| TCGA-V1-A8MG | FALSE    | 0.61 | 0.42  | 0.36      | -0.02 | 0.47  | TRUE     | 0.61        | 0.55      | 0.04  | 0.03  | 0      |
| TCGA-EJ-5531 | FALSE    | 0.61 | -0.09 | 0.46      | 0.13  | 0.88  | TRUE     | 0.61        | -0.68     | -0.09 | 0.04  | -0.04  |
| TCGA-G9-6363 | FALSE    | 0.61 | 0.67  | 0.86      | -0.19 | -0.02 | FALSE    | -1.66       | 0.61      | 0.05  | 0.01  | 0.02   |
| TCGA-2A-A8VX | FALSE    | 0.61 | -1.23 | 0.82      | -0.26 | -0.39 | FALSE    | -0.99       | 0.61      | 0.09  | -0.06 | 0.06   |
| TCGA-XJ-A9DQ | FALSE    | 0.61 | -1.2  | 0.48      | -0.08 | 0.06  | FALSE    | 0.27        | 0.61      | 0.02  | -0.01 | 0.06   |
| TCGA-V1-A9OY | FALSE    | 0.61 | 0.14  | 0.4       | -0.23 | 0.62  | FALSE    | 0.79        | 0.61      | 0.03  | 0.04  | 0.02   |
| TCGA-Y6-A8TL | FALSE    | 0.6  | -0.76 | 0.7       | 0     | -0.26 | FALSE    | -0.25       | 0.6       | 0.04  | 0.03  | 0.01   |
| TCGA-EJ-8472 | FALSE    | 0.6  | -0.58 | 0.55      | -0.29 | -0.47 | FALSE    | -0.86       | 0.6       | 0.07  | 0.02  | 0      |
| TCGA-J4-A83L | FALSE    | 0.6  | -0.47 | 0.62      | 0.27  | -0.9  | FALSE    | -0.07       | 0.6       | -0.02 | 0.17  | -0.04  |
| TCGA-EJ-7115 | FALSE    | 0.59 | -0.74 | 0.39      | -0.15 | -0.23 | FALSE    | 0.66        | 0.59      | -0.01 | 0.08  | 0.03   |
| TCGA-H9-7775 | FALSE    | 0.58 | -0.74 | 0.44      | -0.36 | -0.67 | FALSE    | -0.68       | 0.58      | -0.03 | 0.09  | 0.04   |
| TCGA-HC-A8D1 | FALSE    | 0.58 | 0.97  | 0.52      | 0.17  | 0.47  | TRUE     | 0.58        | -0.11     | -0.06 | 0.1   | -0.05  |
| TCGA-XK-AAJR | FALSE    | 0.58 | -1.06 | 0.39      | -0.18 | -0.74 | FALSE    | -0.04       | 0.58      | 0.03  | -0.01 | 0.07   |
| TCGA-YL-A9WK | FALSE    | 0.57 | 0.12  | 0.34      | 0.25  | 0.33  | FALSE    | 0.25        | 0.57      | -0.01 | 0.08  | 0.01   |
| TCGA-V1-A8MM | FALSE    | 0.57 | 0.97  | 0.47      | 0.1   | 0.26  | TRUE     | 0.57        | -0.19     | -0.01 | -0.04 | 0.01   |
| TCGA-YL-A8SI | FALSE    | 0.56 | -0.3  | 0.62      | 0.07  | -0.02 | FALSE    | 0.43        | 0.56      | -0.03 | 0.14  | -0.02  |
| TCGA-SU-A7E7 | FALSE    | 0.56 | 1.07  | 0.35      | 0.28  | 0.28  | TRUE     | 0.56        | -0.7      | -0.02 | 0.03  | -0.12  |
| TCGA-YL-A8S8 | FALSE    | 0.56 | -0.19 | 0.27      | -0.06 | -0.39 | FALSE    | 0.02        | 0.56      | 0.07  | 0.02  | -0.01  |
| TCGA-YL-A9WH | FALSE    | 0.55 | 0.33  | 0.54      | -0.28 | -0.92 | FALSE    | -0.58       | 0.55      | 0.12  | -0.04 | 0      |
| TCGA-KK-A8I5 | FALSE    | 0.53 | -0.35 | 0.46      | -0.45 | -0.69 | FALSE    | -0.46       | 0.53      | 0.01  | 0.1   | -0.02  |
| TCGA-XJ-A83F | FALSE    | 0.53 | -1.06 | 0.55      | -0.46 | -0.65 | FALSE    | -0.34       | 0.53      | 0.06  | -0.04 | 0.06   |
| TCGA-V1-A9O7 | FALSE    | 0.52 | -0.05 | 0.21      | 0.07  | 0.15  | FALSE    | 0.7         | 0.52      | 0     | 0.14  | -0.05  |
| TCGA-J4-A67O | FALSE    | 0.51 | -0.14 | 0.89      | 0.39  | -0.15 | FALSE    | 0.97        | 0.51      | 0.01  | 0.05  | 0.01   |
| TCGA-HC-7817 | FALSE    | 0.5  | 0.11  | 0.42      | 0.28  | 0.4   | TRUE     | 0.5         | 0.32      | -0.03 | 0.16  | -0.07  |
| TCGA-VN-A88K | FALSE    | 0.5  | -0.35 | 0.34      | 0.02  | -0.3  | FALSE    | -0.28       | 0.5       | 0.05  | 0.02  | 0      |
| TCGA-HC-A8D0 | FALSE    | 0.49 | -0.4  | 0.37      | -0.03 | 0.49  | TRUE     | 0.49        | 0.74      | 0.02  | 0.06  | 0.03   |
| TCGA-J4-A67K | FALSE    | 0.49 | 0.64  | 0.85      | 0.15  | 0.84  | TRUE     | 0.49        | -0.27     | 0.04  | -0.12 | 0.03   |
| TCGA-J9-A52B | FALSE    | 0.49 | 0.91  | 0.38      | -0.16 | 1.23  | FALSE    | 0.94        | 0.49      | 0.07  | -0.01 | 0.01   |
| TCGA-G9-6494 | FALSE    | 0.48 | -0.39 | 0.57      | -0.1  | -0.65 | FALSE    | -0.45       | 0.48      | -0.02 | 0.06  | 0.04   |
| TCGA-ZG-A9L0 | FALSE    | 0.48 | 0.75  | 0.27      | 0.31  | 0.34  | TRUE     | 0.48        | 0.07      | -0.01 | 0.09  | -0.07  |
| TCGA-HC-7081 | FALSE    | 0.48 | 0.18  | 0.09      | -0.29 | 0.41  | FALSE    | 0.8         | 0.48      | -0.1  | 0.19  | 0      |
| TCGA-XK-AAJT | FALSE    | 0.48 | 0.43  | 0.44      | 0.3   | -0.03 | FALSE    | 1.27        | 0.48      | -0.01 | 0.11  | -0.03  |
| TCGA-KK-A5A1 | FALSE    | 0.47 | 0.27  | 0.62      | 0.42  | -0.24 | FALSE    | -1          | 0.47      | 0.03  | -0.03 | 0.05   |
| TCGA-EJ-5542 | FALSE    | 0.47 | 0.02  | 0.4       | -0.16 | -0.27 | FALSE    | -1.1        | 0.47      | -0.03 | 0.08  | 0.03   |
| TCGA-YL-A8HK | FALSE    | 0.47 | 0.32  | 0.1       | -0.34 | 0.15  | FALSE    | 0.58        | 0.47      | 0.01  | 0.11  | -0.04  |
| TCGA-HC-A631 | FALSE    | 0.47 | 1.03  | 0.74      | -0.41 | -0.57 | FALSE    | -1.23       | 0.47      | 0.1   | -0.05 | 0.01   |
| TCGA-EJ-A65B | FALSE    | 0.46 | -0.95 | 0.74      | -0.17 | -0.42 | FALSE    | 0.7         | 0.46      | 0.01  | 0.02  | 0.04   |
| TCGA-V1-A9ZI | FALSE    | 0.45 | -0.25 | 0.14      | -0.35 | -0.22 | FALSE    | 0.46        | 0.45      | 0.01  | 0.01  | 0.05   |
| TCGA-HC-A4ZV | FALSE    | 0.45 | 0.37  | 0.23      | 0.06  | 0.57  | FALSE    | 0.08        | 0.45      | 0.04  | 0.01  | 0.01   |
| TCGA-XJ-A9DK | FALSE    | 0.44 | -0.9  | 0.49      | 0.01  | 0.42  | FALSE    | 0.36        | 0.44      | 0     | 0.06  | 0.01   |
| TCGA-EJ-A8FO | FALSE    | 0.43 | -0.62 | 0.51      | -0.21 | -0.36 | FALSE    | -0.09       | 0.43      | 0     | 0.03  | 0.04   |
| TCGA-ZG-A9L5 | FALSE    | 0.43 | -0.62 | 0.54      | 0.24  | -0.68 | FALSE    | -0.78       | 0.43      | 0.07  | -0.04 | 0.03   |
| TCGA-V1-A8MK | FALSE    | 0.43 | 0.37  | 0.57      | 0.09  | 0.1   | FALSE    | 0.34        | 0.43      | -0.01 | 0.08  | 0      |
| TCGA-EJ-A46D | FALSE    | 0.42 | -0.94 | 0.57      | -0.4  | 0.17  | FALSE    | 0.2         | 0.42      | 0     | 0     | 0.05   |
| TCGA-G9-6367 | FALSE    | 0.42 | 0.14  | 0.67      | 0.24  | 0.04  | FALSE    | 0.65        | 0.42      | -0.03 | 0.12  | -0.02  |
| TCGA-CH-5763 | FALSE    | 0.4  | -0.64 | 0.48      | 0.37  | 0.16  | FALSE    | 0.21        | 0.4       | -0.04 | 0.19  | -0.08  |
| TCGA-X4-A8KQ | FALSE    | 0.4  | -0.06 | 0.4       | -0.3  | 0.1   | FALSE    | 0.75        | 0.4       | 0.01  | 0.09  | -0.04  |
| TCGA-YL-A8SC | FALSE    | 0.39 | 1.3   | 0.42      | 0.69  | 0.99  | TRUE     | 0.39        | -1.03     | -0.02 | -0.07 | -0.07  |
| TCGA-J9-A8CP | FALSE    | 0.38 | -0.58 | 0.37      | 0.91  | -0.76 | FALSE    | 0.46        | 0.38      | 0.01  | 0.05  | 0      |
| TCGA-KK-A8IM | FALSE    | 0.37 | 0.27  | 0.28      | -0.2  | 0.36  | TRUE     | 0.37        | 0.15      | -0.02 | 0.06  | -0.02  |
| TCGA-HC-A6AQ | FALSE    | 0.37 | -0.58 | 0.85      | -0.16 | 0.3   | TRUE     | 0.37        | 0.11      | 0.04  | -0.11 | 0.07   |
| TCGA-ZG-A9LB | FALSE    | 0.37 | 0.37  | 0.71      | 2.76  | 0.79  | TRUE     | 0.37        | 0.19      | 0.06  | -0.01 | -0.03  |
| TCGA-HC-7232 | FALSE    | 0.36 | -0.12 | 0.36      | -0.37 | -0.24 | FALSE    | -0.38       | 0.36      | -0.01 | 0.04  | 0.03   |
| TCGA-CH-5752 | FALSE    | 0.35 | -0.51 | 0.46      | -0.45 | -0.46 | FALSE    | -1.13       | 0.35      | 0.06  | -0.04 | 0.03   |
| TCGA-G9-6496 | FALSE    | 0.35 | -0.27 | 0.35      | -0.09 | -0.41 | FALSE    | 0.16        | 0.35      | 0.06  | -0.04 | 0.03   |
| TCGA-EJ-7317 | FALSE    | 0.34 | -0.97 | 0.77      | 0.05  | -0.7  | FALSE    | -0.22       | 0.34      | 0.01  | -0.02 | 0.06   |
| TCGA-HC-A48F | FALSE    | 0.33 | -1.12 | 0.37      | -0.6  | -0.82 | FALSE    | -0.99       | 0.33      | 0.04  | -0.03 | 0.04   |
| TCGA-HI-7171 | FALSE    | 0.32 | -0.08 | 0.47      | -0.52 | 0.43  | FALSE    | -0.99       | 0.32      | 0.07  | -0.08 | 0.05   |
| TCGA-G9-6351 | FALSE    | 0.32 | -0.86 | 0.64      | -0.18 | 0.32  | FALSE    | -0.36       | 0.32      | 0     | 0.03  | 0.01   |
| TCGA-EJ-5498 | FALSE    | 0.31 | 0.41  | 0.35      | 0.19  | 0.47  | FALSE    | 0.21        | 0.31      | -0.06 | 0.16  | -0.04  |
| TCGA-CH-5761 | FALSE    | 0.31 | -0.44 | 0.18      | -0.06 | -0.93 | FALSE    | -0.79       | 0.31      | 0.08  | -0.02 | -0.02  |
| TCGA-2A-A8W3 | FALSE    | 0.31 | -0.18 | 0.47      | -0.14 | -0.16 | FALSE    | -0.59       | 0.31      | 0.05  | -0.03 | 0.03   |
| TCGA-QU-A6IP | FALSE    | 0.31 | -0.72 | 0.71      | -0.32 | -0.07 | FALSE    | 0.41        | 0.31      | 0.04  | -0.03 | 0.02   |

| Patient      | Response | TIDE | IFNG  | MSI Score | CD274 | CD8   | CTL.flag | Dysfunction | Exclusion | MDSC  | CAF   | TAM M2 |
|--------------|----------|------|-------|-----------|-------|-------|----------|-------------|-----------|-------|-------|--------|
| TCGA-EJ-A65D | FALSE    | 0.3  | -1.43 | 0.9       | -0.24 | 0.12  | FALSE    | -0.59       | 0.3       | 0.13  | -0.2  | 0.1    |
| TCGA-HC-A9TH | FALSE    | 0.29 | 1.75  | 0.35      | 0.08  | -0.41 | FALSE    | -0.26       | 0.29      | 0.05  | 0.06  | -0.06  |
| TCGA-EJ-7792 | FALSE    | 0.29 | -0.01 | 0.23      | 0.06  | -0.26 | FALSE    | 0.78        | 0.29      | -0.09 | 0.19  | -0.04  |
| TCGA-VP-AA1N | FALSE    | 0.28 | 0.58  | 0.6       | 0.02  | 0.36  | TRUE     | 0.28        | -0.1      | -0.03 | 0.05  | -0.04  |
| TCGA-XK-AAIR | FALSE    | 0.28 | -0.22 | 0.45      | -0.13 | 0.4   | TRUE     | 0.28        | -0.22     | -0.08 | 0.04  | 0.02   |
| TCGA-ZG-A9LS | FALSE    | 0.28 | 1.02  | 0.23      | 0.14  | 0.73  | FALSE    | 1.43        | 0.28      | -0.07 | 0.16  | -0.04  |
| TCGA-HC-7233 | FALSE    | 0.27 | 2.14  | 0.56      | 0.43  | 0.72  | TRUE     | 0.27        | -1.24     | -0.13 | 0.06  | -0.1   |
| TCGA-G9-6377 | FALSE    | 0.27 | 0.71  | 0.51      | 0.32  | 0.55  | TRUE     | 0.27        | -0.38     | 0.01  | 0.01  | -0.07  |
| TCGA-EJ-8470 | FALSE    | 0.27 | 2.37  | 0.48      | 1.13  | 0.97  | TRUE     | 0.27        | -2.51     | -0.13 | -0.13 | -0.12  |
| TCGA-G9-7510 | FALSE    | 0.26 | 0.34  | 0.43      | 0.09  | -0.34 | FALSE    | 1.1         | 0.26      | -0.04 | 0.17  | -0.07  |
| TCGA-G9-6373 | FALSE    | 0.25 | 0.49  | 0.5       | 0.08  | 0.22  | TRUE     | 0.25        | 0.66      | 0.03  | 0.07  | -0.01  |
| TCGA-CH-5751 | FALSE    | 0.23 | 2.13  | 0.16      | 0.99  | 2.24  | TRUE     | 0.23        | -1.43     | -0.04 | -0.13 | -0.05  |
| TCGA-G9-6370 | FALSE    | 0.23 | -0.37 | 0.48      | 0.37  | 0.48  | FALSE    | 0.88        | 0.23      | -0.04 | 0.12  | -0.04  |
| TCGA-KK-A8I8 | FALSE    | 0.22 | 0.67  | 0.57      | -0.43 | 0.23  | FALSE    | -1.08       | 0.22      | 0.08  | -0.13 | 0.07   |
| TCGA-YL-A8SL | FALSE    | 0.22 | -0.88 | 0.46      | -0.65 | -0.96 | FALSE    | -0.92       | 0.22      | 0.13  | -0.16 | 0.05   |
| TCGA-KK-A7AQ | FALSE    | 0.22 | -0.03 | 0.54      | -0.04 | -0.17 | FALSE    | 1.11        | 0.22      | 0.04  | -0.05 | 0.04   |
| TCGA-EJ-5518 | FALSE    | 0.22 | 0.14  | 0.46      | -0.31 | -0.49 | FALSE    | 0.06        | 0.22      | -0.02 | 0.08  | -0.02  |
| TCGA-G9-7519 | FALSE    | 0.21 | -0.56 | 0.87      | 0     | 0.04  | FALSE    | 0.13        | 0.21      | -0.03 | 0.07  | 0      |
| TCGA-EJ-5512 | FALSE    | 0.21 | 0.09  | 0.66      | 0.09  | 0.01  | FALSE    | -0.81       | 0.21      | 0.01  | 0.02  | 0      |
| TCGA-CH-5771 | FALSE    | 0.2  | 0.18  | 0.22      | 0.08  | -0.01 | FALSE    | 1.85        | 0.2       | -0.1  | 0.22  | -0.07  |
| TCGA-HC-8261 | FALSE    | 0.2  | 0.63  | 0.6       | 0.42  | 0.35  | TRUE     | 0.2         | -1.13     | -0.04 | -0.14 | 0      |
| TCGA-EJ-A7NH | FALSE    | 0.2  | -0.49 | 0.37      | -0.12 | 0.24  | FALSE    | 0.89        | 0.2       | -0.01 | -0.02 | 0.06   |
| TCGA-ZG-A9LM | FALSE    | 0.19 | 0.4   | 0.39      | 0     | -0.12 | FALSE    | -0.02       | 0.19      | -0.02 | 0.06  | -0.01  |
| TCGA-KK-A59X | FALSE    | 0.19 | 0.07  | 0.85      | 0.54  | -0.91 | FALSE    | -0.76       | 0.19      | 0.04  | 0     | -0.02  |
| TCGA-J4-A67R | FALSE    | 0.19 | -0.05 | 0.66      | -0.03 | 0.04  | FALSE    | 1.49        | 0.19      | 0.01  | 0.02  | 0      |
| TCGA-HC-A76X | FALSE    | 0.19 | -1.3  | 0.73      | -0.3  | -0.15 | FALSE    | -1.39       | 0.19      | 0.08  | -0.14 | 0.08   |
| TCGA-EJ-5495 | FALSE    | 0.19 | 1.23  | 0.16      | 0.27  | 0.59  | FALSE    | 0.24        | 0.19      | -0.05 | 0.13  | -0.03  |
| TCGA-G9-7522 | FALSE    | 0.19 | 0.16  | 0.48      | -0.16 | 0.32  | TRUE     | 0.19        | -0.07     | -0.09 | 0.11  | -0.03  |
| TCGA-YL-A9WL | FALSE    | 0.18 | -0.05 | 0.39      | -0.5  | -0.16 | FALSE    | -0.51       | 0.18      | 0.09  | -0.12 | 0.05   |
| TCGA-VP-A872 | FALSE    | 0.18 | -0.27 | 0.22      | -0.19 | 0     | FALSE    | 1.18        | 0.18      | -0.01 | 0.07  | -0.03  |
| TCGA-G9-6348 | FALSE    | 0.18 | 0.57  | 0.59      | -0.02 | 0.71  | TRUE     | 0.18        | 0.7       | 0.01  | 0.15  | -0.05  |
| TCGA-V1-A9ZK | FALSE    | 0.18 | -0.49 | 0.51      | -0.04 | -0.21 | FALSE    | -0.04       | 0.18      | -0.02 | 0.03  | 0.02   |
| TCGA-HC-A632 | FALSE    | 0.17 | 0.62  | 0.29      | 0.06  | 0.34  | TRUE     | 0.17        | -0.06     | -0.04 | -0.01 | 0.03   |
| TCGA-KK-A7AZ | FALSE    | 0.17 | -0.31 | 0.42      | -0.39 | -0.01 | FALSE    | -0.31       | 0.17      | 0.07  | -0.11 | 0.06   |
| TCGA-XQ-A8TA | FALSE    | 0.17 | -1.66 | 0.24      | -0.41 | -0.84 | FALSE    | -0.93       | 0.17      | 0.14  | -0.19 | 0.05   |
| TCGA-EJ-A46B | FALSE    | 0.17 | -1.03 | 0.7       | -0.24 | -0.47 | FALSE    | 0.25        | 0.17      | -0.03 | 0     | 0.05   |
| TCGA-KC-A7F3 | FALSE    | 0.16 | -0.72 | 0.7       | -0.01 | 0.08  | FALSE    | -0.39       | 0.16      | 0.06  | -0.03 | -0.01  |
| TCGA-G9-A9S4 | FALSE    | 0.16 | -0.84 | 0.52      | -0.3  | -0.37 | FALSE    | -0.38       | 0.16      | 0.1   | -0.14 | 0.06   |
| TCGA-EJ-5524 | FALSE    | 0.15 | 1.04  | 0.34      | 0.08  | 0.48  | FALSE    | -0.52       | 0.15      | -0.05 | 0.11  | -0.02  |
| TCGA-EJ-5530 | FALSE    | 0.15 | -0.48 | 0.31      | -0.35 | -0.44 | FALSE    | -0.47       | 0.15      | -0.03 | 0.03  | 0.02   |
| TCGA-EJ-8469 | FALSE    | 0.14 | 0.32  | 0.51      | -0.05 | -0.29 | FALSE    | -1.39       | 0.14      | 0.08  | -0.09 | 0.03   |
| TCGA-EJ-7793 | FALSE    | 0.14 | -0.62 | 0.69      | -0.12 | 0.01  | FALSE    | -0.49       | 0.14      | -0.01 | -0.01 | 0.04   |
| TCGA-ZG-A9KY | FALSE    | 0.13 | 1.67  | 0.72      | 1.47  | 2.38  | TRUE     | 0.13        | -1.2      | 0     | -0.18 | -0.01  |
| TCGA-KK-A7B4 | FALSE    | 0.13 | 0.67  | 0.31      | -0.38 | 0.45  | FALSE    | -0.04       | 0.13      | 0.07  | -0.09 | 0.03   |
| TCGA-HC-A6AN | FALSE    | 0.13 | -0.5  | 0.83      | -0.16 | -0.41 | FALSE    | 0.2         | 0.13      | 0.02  | -0.08 | 0.07   |
| TCGA-KK-A59Z | FALSE    | 0.13 | -0.13 | 0.21      | 0.39  | -0.23 | FALSE    | 0.81        | 0.13      | -0.02 | 0.08  | -0.03  |
| TCGA-EJ-A46I | FALSE    | 0.12 | -0.33 | 0.45      | 0     | -0.08 | FALSE    | 0.91        | 0.12      | -0.02 | 0.04  | 0      |
| TCGA-EJ-5511 | FALSE    | 0.12 | -0.47 | 0.29      | -0.2  | -0.77 | FALSE    | -0.56       | 0.12      | -0.02 | 0.03  | 0.02   |
| TCGA-G9-6342 | FALSE    | 0.12 | -0.36 | 0.43      | -0.44 | -0.14 | FALSE    | -0.19       | 0.12      | 0.02  | -0.01 | 0.01   |
| TCGA-M7-A721 | FALSE    | 0.12 | -0.16 | 0.49      | -0.06 | -0.15 | FALSE    | 0.39        | 0.12      | -0.02 | 0.01  | 0.03   |
| TCGA-G9-6336 | FALSE    | 0.11 | -0.57 | 0.62      | 0.02  | 0.1   | FALSE    | 0.27        | 0.11      | 0     | 0.05  | -0.03  |
| TCGA-ZG-A9LY | FALSE    | 0.1  | -0.54 | 0.27      | -0.25 | 0.28  | FALSE    | 0.31        | 0.1       | -0.05 | 0.09  | -0.02  |
| TCGA-KK-A6E7 | FALSE    | 0.1  | -0.8  | 0.83      | -0.31 | -0.95 | FALSE    | -0.34       | 0.1       | 0.07  | -0.1  | 0.03   |
| TCGA-EJ-A7NK | FALSE    | 0.1  | -0.44 | 0.48      | -0.23 | -0.32 | FALSE    | 0.97        | 0.1       | -0.01 | 0.05  | -0.02  |
| TCGA-V1-A9O5 | FALSE    | 0.1  | 1.66  | 0.12      | 0.2   | 0.62  | TRUE     | 0.1         | -0.46     | 0.03  | -0.06 | -0.04  |
| TCGA-M7-A71Z | FALSE    | 0.09 | -1.29 | 0.87      | -0.11 | -0.66 | FALSE    | -0.37       | 0.09      | 0.09  | -0.17 | 0.09   |
| TCGA-HC-7821 | FALSE    | 0.09 | 1.22  | 0.15      | 0.95  | -0.26 | FALSE    | 0.44        | 0.09      | -0.06 | 0.11  | -0.04  |
| TCGA-KK-A7AP | FALSE    | 0.08 | -0.34 | 0.71      | -0.15 | -0.45 | FALSE    | -0.6        | 0.08      | 0.07  | -0.12 | 0.05   |
| TCGA-EJ-A6RC | FALSE    | 0.07 | -0.03 | 0.39      | 0.02  | 0.23  | FALSE    | 1.67        | 0.07      | -0.06 | 0.1   | -0.02  |
| TCGA-KK-A8IA | FALSE    | 0.07 | 0.66  | 0.56      | -0.29 | -0.84 | FALSE    | -1.14       | 0.07      | 0.08  | -0.1  | 0.02   |
| TCGA-EJ-7330 | FALSE    | 0.06 | -0.42 | 0.27      | 0.17  | -0.14 | FALSE    | 0.45        | 0.06      | -0.04 | 0.1   | -0.04  |
| TCGA-KC-A7F6 | FALSE    | 0.06 | -0.73 | 0.41      | -0.24 | 0.24  | TRUE     | 0.06        | 0.4       | 0.1   | -0.06 | 0.02   |
| TCGA-EJ-A46F | FALSE    | 0.06 | -0.63 | 0.85      | -0.11 | 0.54  | FALSE    | -0.57       | 0.06      | 0.09  | -0.19 | 0.09   |
| TCGA-G9-6371 | FALSE    | 0.06 | 0.21  | 0.71      | -0.07 | 0.08  | FALSE    | -0.79       | 0.06      | 0.05  | -0.08 | 0.03   |
| TCGA-EJ-5527 | FALSE    | 0.05 | 0.37  | 0.28      | 0.09  | 0.21  | FALSE    | -0.55       | 0.05      | -0.08 | 0.11  | -0.02  |
| TCGA-YL-A8SQ | FALSE    | 0.03 | -0.06 | 0.31      | 0.56  | -0.38 | FALSE    | 0.16        | 0.03      | 0.01  | -0.05 | 0.04   |
| TCGA-EJ-7331 | FALSE    | 0.02 | 0.29  | 0.52      | 0.28  | -0.45 | FALSE    | -0.15       | 0.02      | -0.09 | 0.15  | -0.04  |
| TCGA-YL-A9WI | FALSE    | 0.02 | 0.2   | 0.68      | -0.1  | -0.72 | FALSE    | -0.65       | 0.02      | 0.07  | -0.1  | 0.01   |
| TCGA-EJ-7782 | FALSE    | 0.02 | 0.17  | 0.39      | -0.23 | -1.15 | FALSE    | 0.1         | 0.02      | 0     | 0     | 0      |
| TCGA-EJ-7786 | FALSE    | 0.01 | -0.4  | 0.67      | 0     | -0.48 | FALSE    | -0.32       | 0.01      | -0.05 | 0.05  | 0.01   |

| Patient      | Response | TIDE  | IFNG  | MSI Score | CD274 | CD8   | CTL.flag | Dysfunction | Exclusion | MDSC  | CAF   | TAM M2 |
|--------------|----------|-------|-------|-----------|-------|-------|----------|-------------|-----------|-------|-------|--------|
| TCGA-EJ-7312 | FALSE    | 0.01  | -0.72 | 0.81      | -0.23 | -0.03 | FALSE    | -0.06       | 0.01      | 0.02  | -0.08 | 0.06   |
| TCGA-V1-A9OL | FALSE    | 0.01  | 0.38  | 0.39      | 0.12  | 0.14  | FALSE    | -0.1        | 0.01      | 0.04  | -0.05 | 0.01   |
| TCGA-FC-A66V | FALSE    | 0.01  | -0.28 | 0.88      | -0.23 | 0.4   | FALSE    | 1.03        | 0.01      | -0.01 | -0.02 | 0.02   |
| TCGA-G9-6339 | FALSE    | 0.01  | 0.72  | 0.76      | -0.08 | 0.67  | TRUE     | 0.01        | -0.36     | 0.04  | -0.08 | -0.02  |
| TCGA-EJ-7314 | FALSE    | 0.01  | -0.32 | 0.58      | -0.08 | 0.08  | FALSE    | -0.46       | 0.01      | 0.08  | -0.06 | -0.02  |
| TCGA-EJ-A46H | TRUE     | 0     | -1.01 | 0.15      | 0     | 0.56  | FALSE    | 1.51        | 0         | -0.07 | 0.13  | -0.05  |
| TCGA-EJ-5532 | TRUE     | 0     | -0.15 | 0.61      | 0.12  | -0.88 | FALSE    | -0.83       | 0         | -0.02 | 0.02  | 0.01   |
| TCGA-J4-8200 | TRUE     | -0.01 | -0.2  | 0.73      | -0.05 | -0.76 | FALSE    | -0.65       | -0.01     | -0.06 | 0.09  | -0.02  |
| TCGA-HC-7740 | TRUE     | -0.01 | -0.16 | 0.37      | 0.07  | 0.39  | FALSE    | 1.47        | -0.01     | -0.06 | 0.14  | -0.07  |
| TCGA-KK-A6E4 | TRUE     | -0.02 | 0.56  | 0.87      | 0.07  | 0.08  | FALSE    | -0.16       | -0.02     | 0.07  | -0.13 | 0.05   |
| TCGA-EJ-5515 | TRUE     | -0.02 | 0.33  | 0.71      | 0.01  | 0.23  | FALSE    | -0.88       | -0.02     | -0.06 | 0.07  | -0.01  |
| TCGA-VP-A87H | TRUE     | -0.02 | -0.27 | 0.58      | -0.07 | -0.44 | FALSE    | 0.08        | -0.02     | 0.08  | -0.07 | -0.01  |
| TCGA-HC-7213 | TRUE     | -0.02 | -0.03 | 0.26      | -0.37 | -0.26 | FALSE    | 0.12        | -0.02     | 0.04  | 0     | -0.03  |
| TCGA-HC-7749 | TRUE     | -0.03 | 0.34  | 0.45      | 0.08  | -0.14 | FALSE    | -0.53       | -0.03     | -0.03 | 0.02  | 0      |
| TCGA-VN-A88R | TRUE     | -0.03 | -0.21 | 0.73      | 0.43  | -0.92 | FALSE    | -0.06       | -0.03     | 0.02  | -0.08 | 0.05   |
| TCGA-V1-A8WS | TRUE     | -0.04 | -0.29 | 0.47      | -0.23 | -0.36 | FALSE    | -1.07       | -0.04     | 0.06  | -0.14 | 0.06   |
| TCGA-V1-A8WV | TRUE     | -0.04 | 0.49  | 0.06      | -0.27 | 0.6   | FALSE    | 0.34        | -0.04     | 0.04  | -0.06 | 0      |
| TCGA-YL-A8HO | TRUE     | -0.04 | 0.22  | 0.32      | 0.17  | 0.3   | FALSE    | 1.39        | -0.04     | -0.09 | 0.08  | 0      |
| TCGA-G9-7521 | TRUE     | -0.04 | 2.53  | 0.28      | 0.59  | 1.48  | TRUE     | -0.04       | -0.58     | -0.06 | 0.06  | -0.08  |
| TCGA-VN-A88P | TRUE     | -0.04 | 0.23  | 0.58      | 0.14  | -0.01 | FALSE    | -0.09       | -0.04     | -0.03 | 0.03  | 0      |
| TCGA-V1-A9OQ | TRUE     | -0.05 | -0.33 | 0.81      | -0.1  | 0.51  | TRUE     | -0.05       | -0.12     | -0.01 | -0.07 | 0.05   |
| TCGA-HC-7744 | TRUE     | -0.06 | -0.87 | 0.66      | -0.43 | -0.76 | FALSE    | -1.37       | -0.06     | 0.08  | -0.12 | 0.03   |
| TCGA-ZG-A8QX | TRUE     | -0.06 | -0.45 | 0.83      | -0.14 | -0.22 | FALSE    | 0.03        | -0.06     | -0.01 | 0.01  | -0.01  |
| TCGA-EJ-A46G | TRUE     | -0.06 | 0.62  | 0.22      | 0.28  | -0.36 | FALSE    | 0.36        | -0.06     | 0.02  | -0.01 | -0.03  |
| TCGA-EJ-A8FP | TRUE     | -0.07 | -0.33 | 0.37      | 0.06  | 0.21  | FALSE    | 0.94        | -0.07     | -0.07 | 0.09  | -0.03  |
| TCGA-EJ-5497 | TRUE     | -0.07 | -0.3  | 0.46      | -0.01 | 0.24  | FALSE    | -0.74       | -0.07     | -0.06 | 0.05  | 0.01   |
| TCGA-G9-6338 | TRUE     | -0.07 | -0.57 | 0.61      | 0.12  | -0.32 | FALSE    | 0.65        | -0.07     | -0.02 | 0.04  | -0.02  |
| TCGA-FC-A6HD | TRUE     | -0.07 | -0.9  | 0.98      | 0.2   | 0.09  | FALSE    | -0.5        | -0.07     | 0.1   | -0.22 | 0.09   |
| TCGA-M7-A720 | TRUE     | -0.07 | -0.79 | 0.57      | -0.06 | -0.08 | FALSE    | 0.74        | -0.07     | -0.04 | 0.03  | 0      |
| TCGA-CH-5766 | TRUE     | -0.08 | 0.69  | 0.45      | -0.1  | 0.32  | TRUE     | -0.08       | -1.4      | -0.06 | -0.09 | -0.06  |
| TCGA-CH-5740 | TRUE     | -0.08 | 0.65  | 0.74      | -0.05 | 0.45  | FALSE    | -0.86       | -0.08     | 0.06  | -0.1  | 0.03   |
| TCGA-ZG-A9N3 | TRUE     | -0.09 | 0.77  | 0.16      | -0.07 | 0.32  | TRUE     | -0.09       | -0.18     | 0.11  | -0.13 | -0.03  |
| TCGA-KK-A8IF | TRUE     | -0.09 | -0.47 | 0.62      | 0.07  | -0.94 | FALSE    | -0.85       | -0.09     | 0.05  | -0.12 | 0.05   |
| TCGA-VP-A87D | TRUE     | -0.09 | -0.55 | 0.49      | -0.32 | -0.38 | FALSE    | -0.71       | -0.09     | 0.03  | -0.1  | 0.04   |
| TCGA-G9-6343 | TRUE     | -0.1  | -0.74 | 0.8       | 0.13  | -0.07 | FALSE    | 0.71        | -0.1      | -0.01 | -0.04 | 0.03   |
| TCGA-KC-A7F5 | TRUE     | -0.1  | -0.27 | 0.87      | -0.05 | -0.86 | FALSE    | -0.66       | -0.1      | 0.08  | -0.16 | 0.05   |
| TCGA-G9-6369 | TRUE     | -0.1  | -0.68 | 0.84      | 0.66  | -0.45 | FALSE    | -0.2        | -0.1      | 0.03  | -0.08 | 0.02   |
| TCGA-EJ-5503 | TRUE     | -0.1  | -0.52 | 0.42      | -0.11 | 0.3   | FALSE    | 1.26        | -0.1      | -0.06 | 0.09  | -0.04  |
| TCGA-EJ-5526 | TRUE     | -0.11 | 0.1   | 0.31      | 0.35  | -0.12 | FALSE    | -0.77       | -0.11     | -0.06 | 0.1   | -0.04  |
| TCGA-KK-A8I9 | TRUE     | -0.11 | -0.12 | 0.24      | 0.88  | 0.27  | FALSE    | 1.02        | -0.11     | 0.02  | 0.06  | -0.1   |
| TCGA-V1-A8WW | TRUE     | -0.11 | 0.61  | 0.34      | -0.19 | -0.68 | FALSE    | 0.48        | -0.11     | 0.05  | -0.01 | -0.06  |
| TCGA-EJ-5521 | TRUE     | -0.12 | 0     | 0.57      | -0.14 | 0.2   | FALSE    | 0.25        | -0.12     | -0.02 | 0     | 0.01   |
| TCGA-HC-A8CY | TRUE     | -0.12 | 1.42  | 0.63      | 0.32  | 0.58  | TRUE     | -0.12       | -1.55     | -0.03 | -0.16 | -0.04  |
| TCGA-HC-8260 | TRUE     | -0.12 | 0.47  | 0.51      | -0.03 | -0.17 | FALSE    | 0.06        | -0.12     | -0.03 | 0     | 0.01   |
| TCGA-HC-A6AL | TRUE     | -0.12 | 0.31  | 0.82      | -0.18 | 0.01  | FALSE    | 0.41        | -0.12     | 0.03  | -0.09 | 0.04   |
| TCGA-V1-A8WN | TRUE     | -0.13 | 0.51  | 0.48      | 0.17  | 0.23  | TRUE     | -0.13       | 0.04      | -0.02 | 0.07  | -0.04  |
| TCGA-QU-A6IN | TRUE     | -0.14 | -1.36 | 0.86      | 0.21  | -0.01 | FALSE    | 0.24        | -0.14     | 0.07  | -0.16 | 0.06   |
| TCGA-KC-A7FA | TRUE     | -0.14 | 0.45  | 0.45      | -0.21 | 0     | FALSE    | -0.02       | -0.14     | 0.01  | -0.03 | -0.01  |
| TCGA-M7-A722 | TRUE     | -0.14 | -0.76 | 0.95      | 0.54  | -0.47 | FALSE    | -0.08       | -0.14     | 0.05  | -0.17 | 0.08   |
| TCGA-EJ-7325 | TRUE     | -0.15 | -0.96 | 0.87      | 0.07  | -0.2  | FALSE    | 0.68        | -0.15     | 0.03  | -0.11 | 0.05   |
| TCGA-EJ-A6RA | TRUE     | -0.16 | -0.1  | 0.72      | -0.07 | 0.46  | FALSE    | 0.71        | -0.16     | 0.01  | -0.08 | 0.04   |
| TCGA-2A-A8VL | TRUE     | -0.16 | -0.41 | 0.74      | 0     | -0.15 | FALSE    | -0.19       | -0.16     | -0.01 | -0.03 | 0      |
| TCGA-HC-A6HY | TRUE     | -0.17 | -0.24 | 0.76      | -0.35 | 0.39  | TRUE     | -0.17       | -0.05     | 0.08  | -0.16 | 0.06   |
| TCGA-CH-5788 | TRUE     | -0.17 | -0.2  | 0.67      | 0.11  | -1.07 | FALSE    | -1.03       | -0.17     | 0.06  | -0.12 | 0.03   |
| TCGA-EJ-5509 | TRUE     | -0.17 | 0.29  | 0.38      | 0.31  | 0.01  | FALSE    | 1.2         | -0.17     | -0.07 | 0.06  | -0.01  |
| TCGA-YL-A8SH | TRUE     | -0.17 | -0.51 | 0.51      | -0.31 | -0.24 | FALSE    | 0.37        | -0.17     | 0.01  | -0.05 | 0.01   |
| TCGA-YJ-A8SW | TRUE     | -0.17 | -0.54 | 0.74      | -0.04 | -0.74 | FALSE    | -0.65       | -0.17     | 0.04  | -0.08 | 0.01   |
| TCGA-KK-A7AY | TRUE     | -0.18 | 0.27  | 0.86      | -0.15 | 0.14  | TRUE     | -0.18       | 0.38      | 0.07  | -0.07 | 0.04   |
| TCGA-CH-5739 | TRUE     | -0.18 | 0.95  | 0.42      | -0.12 | -0.05 | FALSE    | -0.44       | -0.18     | -0.05 | 0.09  | -0.05  |
| TCGA-XA-A8JR | TRUE     | -0.18 | 0.46  | 0.75      | 0.24  | -0.45 | FALSE    | 0.25        | -0.18     | -0.02 | 0.07  | -0.08  |
| TCGA-EJ-5517 | TRUE     | -0.19 | 0.27  | 0.62      | 0.13  | 0.29  | FALSE    | -0.75       | -0.19     | -0.08 | 0.06  | -0.01  |
| TCGA-EJ-7783 | TRUE     | -0.19 | -0.55 | 0.23      | -0.05 | 0.16  | FALSE    | 0.17        | -0.19     | -0.02 | 0.02  | -0.02  |
| TCGA-HC-7231 | TRUE     | -0.19 | 1.35  | 0.43      | 0.02  | 0.53  | TRUE     | -0.19       | -1.2      | -0.06 | -0.1  | -0.01  |
| TCGA-EJ-5510 | TRUE     | -0.2  | 0.66  | 0.43      | 0.01  | 0.56  | FALSE    | 0.57        | -0.2      | -0.03 | 0.05  | -0.04  |
| TCGA-HC-7212 | TRUE     | -0.2  | 0.28  | 0.27      | -0.49 | -0.67 | FALSE    | -0.87       | -0.2      | 0     | -0.04 | 0.02   |
| TCGA-EJ-A46E | TRUE     | -0.21 | -0.81 | 0.47      | 0.26  | 0.36  | FALSE    | 0.93        | -0.21     | -0.02 | 0.06  | -0.07  |
| TCGA-XK-AAK1 | TRUE     | -0.21 | -0.02 | 0.92      | 0.67  | 0.22  | TRUE     | -0.21       | -0.84     | 0.01  | -0.19 | 0.04   |
| TCGA-CH-5746 | TRUE     | -0.22 | -0.78 | 0.58      | -0.26 | -0.38 | FALSE    | -1.09       | -0.22     | 0.02  | -0.08 | 0.02   |
| TCGA-EJ-7789 | TRUE     | -0.22 | -0.59 | 0.61      | -0.19 | -1    | FALSE    | -1.06       | -0.22     | 0.04  | -0.15 | 0.07   |
| TCGA-KK-A59Y | TRUE     | -0.23 | -0.33 | 0.54      | -0.48 | -0.1  | FALSE    | -0.41       | -0.23     | 0.05  | -0.12 | 0.03   |

| Patient      | Response | TIDE  | IFNG  | MSI Score | CD274 | CD8   | CTL.flag | Dysfunction | Exclusion | MDSC  | CAF   | TAM M2 |
|--------------|----------|-------|-------|-----------|-------|-------|----------|-------------|-----------|-------|-------|--------|
| TCGA-EJ-5494 | TRUE     | -0.24 | 0.69  | 0.41      | 0.52  | 0.81  | FALSE    | 0.42        | -0.24     | -0.02 | 0     | -0.01  |
| TCGA-CH-5762 | TRUE     | -0.24 | 0.49  | 0.33      | 0.14  | 0.41  | TRUE     | -0.24       | -0.4      | -0.04 | 0.05  | -0.07  |
| TCGA-EJ-A65E | TRUE     | -0.24 | -0.13 | 0.79      | -0.33 | -0.44 | FALSE    | -0.91       | -0.24     | 0.04  | -0.1  | 0.01   |
| TCGA-CH-5791 | TRUE     | -0.24 | 0.2   | 0.45      | -0.14 | -0.86 | FALSE    | -0.64       | -0.24     | -0.01 | -0.02 | 0      |
| TCGA-VP-A878 | TRUE     | -0.24 | -0.47 | 0.29      | 0.17  | 0.06  | FALSE    | 1.07        | -0.24     | -0.04 | 0.04  | -0.03  |
| TCGA-EJ-7785 | TRUE     | -0.25 | -0.07 | 0.21      | -0.04 | 0.3   | FALSE    | 0.47        | -0.25     | -0.09 | 0.11  | -0.04  |
| TCGA-J4-A83I | TRUE     | -0.25 | 1.22  | 0.3       | 0.14  | 0.04  | FALSE    | -0.06       | -0.25     | -0.02 | 0.02  | -0.04  |
| TCGA-CH-5772 | TRUE     | -0.25 | 0.92  | 0.72      | 0.37  | -0.19 | FALSE    | -1.3        | -0.25     | 0.01  | -0.04 | -0.01  |
| TCGA-VP-A876 | TRUE     | -0.25 | 0.21  | 0.59      | -0.46 | 0.16  | FALSE    | -1.28       | -0.25     | 0.09  | -0.18 | 0.05   |
| TCGA-J4-AATV | TRUE     | -0.26 | -0.72 | 0.41      | -0.05 | -0.45 | FALSE    | 1.4         | -0.26     | -0.05 | 0.11  | -0.09  |
| TCGA-G9-6384 | TRUE     | -0.26 | 1.1   | 0.33      | 0.14  | 0.4   | FALSE    | 0.15        | -0.26     | -0.04 | 0.07  | -0.06  |
| TCGA-KK-A8IB | TRUE     | -0.26 | -0.2  | 0.57      | 0.31  | 0.54  | FALSE    | 0.81        | -0.26     | 0.02  | -0.02 | -0.04  |
| TCGA-CH-5794 | TRUE     | -0.26 | -0.29 | 0.48      | -0.31 | 0.33  | FALSE    | -0.16       | -0.26     | 0.04  | -0.07 | -0.01  |
| TCGA-EJ-A65M | TRUE     | -0.27 | 0.15  | 0.81      | -0.08 | 0.47  | TRUE     | -0.27       | 0         | 0.02  | -0.09 | 0.05   |
| TCGA-KK-A816 | TRUE     | -0.27 | -0.01 | 0.47      | -0.18 | -0.27 | FALSE    | -0.53       | -0.27     | 0.04  | -0.13 | 0.04   |
| TCGA-G9-6332 | TRUE     | -0.29 | -0.27 | 0.78      | -0.29 | 0.57  | FALSE    | -1.06       | -0.29     | 0.01  | -0.15 | 0.08   |
| TCGA-KK-A6E2 | TRUE     | -0.29 | 0.21  | 0.65      | -0.31 | -0.2  | FALSE    | -0.93       | -0.29     | 0.02  | -0.13 | 0.06   |
| TCGA-EJ-5514 | TRUE     | -0.3  | 0.61  | 0.3       | 0.17  | -0.62 | FALSE    | -0.73       | -0.3      | -0.04 | 0.03  | -0.02  |
| TCGA-EJ-7125 | TRUE     | -0.31 | 0.47  | 0.7       | 0.08  | -0.15 | FALSE    | -0.15       | -0.31     | -0.04 | 0.02  | -0.02  |
| TCGA-CH-5765 | TRUE     | -0.31 | -0.8  | 0.55      | -0.27 | -0.88 | FALSE    | -1.55       | -0.31     | 0.02  | -0.08 | 0.02   |
| TCGA-VN-A88M | TRUE     | -0.31 | -0.68 | 0.71      | -0.09 | 0.1   | FALSE    | -0.32       | -0.31     | 0.06  | -0.17 | 0.05   |
| TCGA-EJ-5519 | TRUE     | -0.32 | -0.42 | 0.35      | -0.3  | -0.67 | FALSE    | -0.13       | -0.32     | -0.01 | -0.02 | 0      |
| TCGA-HC-8259 | TRUE     | -0.33 | -0.09 | 0.69      | -0.39 | -0.14 | FALSE    | -0.98       | -0.33     | 0.03  | -0.14 | 0.05   |
| TCGA-YL-A8HL | TRUE     | -0.34 | -0.25 | 0.4       | -0.54 | -0.29 | FALSE    | -0.78       | -0.34     | 0.01  | -0.09 | 0.02   |
| TCGA-HC-7748 | TRUE     | -0.35 | 1.17  | 0.3       | 0.02  | 0.2   | FALSE    | 0.32        | -0.35     | -0.1  | 0.13  | -0.07  |
| TCGA-G9-6333 | TRUE     | -0.35 | 1.18  | 0.64      | 0.42  | -0.02 | FALSE    | 0.68        | -0.35     | -0.04 | 0.07  | -0.09  |
| TCGA-EJ-A65F | TRUE     | -0.35 | 0.01  | 0.48      | 0.12  | 0.6   | TRUE     | -0.35       | 0.06      | 0     | 0     | 0.01   |
| TCGA-HC-8257 | TRUE     | -0.36 | 0.3   | 0.52      | 0.28  | 0.67  | TRUE     | -0.36       | -0.05     | 0.03  | -0.09 | 0.04   |
| TCGA-CH-5741 | TRUE     | -0.36 | -0.51 | 0.78      | -0.25 | 0.61  | FALSE    | -1.01       | -0.36     | 0.01  | -0.12 | 0.04   |
| TCGA-HC-8262 | TRUE     | -0.37 | 0.18  | 0.55      | -0.18 | 0.55  | FALSE    | -0.42       | -0.37     | 0.04  | -0.14 | 0.03   |
| TCGA-TP-A8TV | TRUE     | -0.37 | -0.83 | 0.78      | -0.02 | -0.67 | FALSE    | -0.57       | -0.37     | 0.05  | -0.17 | 0.05   |
| TCGA-EJ-A65G | TRUE     | -0.39 | -0.69 | 0.92      | -0.08 | -0.64 | FALSE    | -0.98       | -0.39     | -0.02 | -0.1  | 0.05   |
| TCGA-MG-AAMC | TRUE     | -0.39 | 0.18  | 0.8       | -0.09 | 0.06  | FALSE    | -0.8        | -0.39     | 0.05  | -0.15 | 0.03   |
| TCGA-G9-A9S0 | TRUE     | -0.39 | 0.63  | 0.82      | -0.29 | 0.52  | TRUE     | -0.39       | -0.74     | 0.03  | -0.15 | 0      |
| TCGA-XJ-A9DX | TRUE     | -0.4  | -0.57 | 0.69      | 0.6   | -0.6  | FALSE    | -0.01       | -0.4      | 0.01  | -0.11 | 0.03   |
| TCGA-VP-A875 | TRUE     | -0.4  | -0.74 | 0.55      | -0.31 | -1.14 | FALSE    | -1.06       | -0.4      | 0.05  | -0.18 | 0.05   |
| TCGA-YL-A8HM | TRUE     | -0.4  | 1.85  | 0.76      | 0.34  | 1.53  | TRUE     | -0.4        | -1        | 0.01  | -0.19 | 0.01   |
| TCGA-VP-A87J | TRUE     | -0.41 | -0.07 | 0.61      | -0.43 | -0.74 | FALSE    | -0.66       | -0.41     | -0.01 | -0.01 | -0.04  |
| TCGA-KK-A6E8 | TRUE     | -0.42 | -0.89 | 0.92      | 0.04  | -0.28 | FALSE    | -1.04       | -0.42     | 0.02  | -0.16 | 0.07   |
| TCGA-QU-A6IL | TRUE     | -0.42 | -0.8  | 0.89      | 0.15  | 0.14  | FALSE    | 0.57        | -0.42     | 0.04  | -0.13 | 0.02   |
| TCGA-2A-A8VO | TRUE     | -0.44 | -0.12 | 0.71      | -0.01 | -0.27 | FALSE    | -0.02       | -0.44     | -0.02 | -0.02 | -0.03  |
| TCGA-HC-8265 | TRUE     | -0.44 | 0.47  | 0.65      | 0.51  | -0.01 | FALSE    | 0.47        | -0.44     | 0.01  | -0.05 | -0.03  |
| TCGA-G9-6362 | TRUE     | -0.46 | 0.74  | 0.42      | 0.67  | 0.26  | FALSE    | -0.56       | -0.46     | 0     | -0.08 | 0.01   |
| TCGA-XJ-A83G | TRUE     | -0.47 | -0.26 | 0.81      | -0.08 | -0.14 | FALSE    | -0.19       | -0.47     | 0.03  | -0.16 | 0.05   |
| TCGA-KK-A6E5 | TRUE     | -0.47 | 0.38  | 0.67      | 0.14  | -0.22 | FALSE    | 0.31        | -0.47     | -0.04 | -0.08 | 0.04   |
| TCGA-HC-7230 | TRUE     | -0.48 | -0.12 | 0.57      | -0.21 | -0.72 | FALSE    | -1.27       | -0.48     | 0.05  | -0.14 | 0.02   |
| TCGA-EJ-5496 | TRUE     | -0.48 | -0.1  | 0.7       | -0.16 | 0.22  | FALSE    | -1.41       | -0.48     | 0     | -0.11 | 0.03   |
| TCGA-KK-A8IJ | TRUE     | -0.48 | -0.83 | 0.7       | -0.07 | -0.74 | FALSE    | -0.39       | -0.48     | -0.03 | -0.01 | -0.02  |
| TCGA-VP-A87B | TRUE     | -0.48 | -0.68 | 0.46      | 0.34  | -0.57 | FALSE    | 0.56        | -0.48     | 0     | -0.12 | 0.04   |
| TCGA-ZG-A9LZ | TRUE     | -0.49 | 1.79  | 0.6       | 0.14  | 0.1   | TRUE     | -0.49       | -0.7      | 0.04  | -0.08 | -0.07  |
| TCGA-EJ-7794 | TRUE     | -0.49 | -0.32 | 0.38      | -0.06 | -0.31 | FALSE    | 0.47        | -0.49     | -0.1  | 0.09  | -0.05  |
| TCGA-YL-A8SR | TRUE     | -0.5  | -0.44 | 0.36      | 0.27  | -0.47 | FALSE    | -0.48       | -0.5      | -0.03 | -0.07 | 0.02   |
| TCGA-KK-A8IK | TRUE     | -0.5  | -1.42 | 0.5       | -0.12 | -1    | FALSE    | -1.03       | -0.5      | 0.06  | -0.23 | 0.08   |
| TCGA-CH-5750 | TRUE     | -0.5  | 1.04  | 0.52      | 0.2   | 1.04  | TRUE     | -0.5        | -1.46     | 0     | -0.16 | -0.06  |
| TCGA-FC-A5OB | TRUE     | -0.51 | -0.86 | 0.96      | -0.29 | -1.1  | FALSE    | -1.85       | -0.51     | 0.01  | -0.16 | 0.06   |
| TCGA-EJ-A7NF | TRUE     | -0.51 | 0.15  | 0.8       | -0.17 | -0.05 | FALSE    | -0.69       | -0.51     | 0.05  | -0.22 | 0.08   |
| TCGA-EJ-5508 | TRUE     | -0.51 | 0.41  | 0.31      | 0.07  | 0.53  | TRUE     | -0.51       | -0.98     | -0.09 | -0.02 | -0.03  |
| TCGA-HC-7736 | TRUE     | -0.52 | 0.01  | 0.4       | 0.03  | -0.25 | FALSE    | 0.27        | -0.52     | -0.05 | 0.03  | -0.05  |
| TCGA-EJ-A8FN | TRUE     | -0.52 | 0.15  | 0.76      | -0.05 | 0.07  | FALSE    | 0.4         | -0.52     | -0.08 | 0     | 0      |
| TCGA-2A-AAFY | TRUE     | -0.53 | -0.39 | 0.87      | 0.01  | -0.46 | FALSE    | -0.79       | -0.53     | -0.02 | -0.09 | 0.03   |
| TCGA-ZG-A9ND | TRUE     | -0.53 | -0.18 | 0.74      | 0.24  | 0.14  | FALSE    | -0.41       | -0.53     | 0.05  | -0.14 | 0      |
| TCGA-J4-A83N | TRUE     | -0.53 | -0.06 | 0.73      | -0.37 | -0.31 | FALSE    | -0.6        | -0.53     | 0.01  | -0.12 | 0.02   |
| TCGA-HC-7209 | TRUE     | -0.53 | 0.09  | 0.57      | -0.22 | -0.02 | FALSE    | -0.18       | -0.53     | -0.01 | 0     | -0.06  |
| TCGA-EJ-5505 | TRUE     | -0.54 | -0.49 | 0.76      | 0.21  | -0.04 | FALSE    | -1.17       | -0.54     | -0.03 | -0.1  | 0.05   |
| TCGA-VP-A87K | TRUE     | -0.55 | 0.34  | 0.36      | -0.21 | 0.62  | FALSE    | -0.51       | -0.55     | 0.05  | -0.2  | 0.05   |
| TCGA-HC-7738 | TRUE     | -0.56 | -0.11 | 0.69      | -0.06 | -0.42 | FALSE    | -0.89       | -0.56     | 0     | -0.12 | 0.03   |
| TCGA-EJ-7321 | TRUE     | -0.56 | 1.29  | 0.67      | 0.12  | 0.47  | TRUE     | -0.56       | -1.17     | -0.02 | -0.15 | -0.01  |
| TCGA-G9-6366 | TRUE     | -0.57 | 0.73  | 0.76      | -0.16 | 0.19  | TRUE     | -0.57       | -0.55     | -0.02 | -0.08 | 0.01   |
| TCGA-KK-A6E1 | TRUE     | -0.57 | 0.42  | 0.43      | -0.2  | -0.78 | FALSE    | -0.7        | -0.57     | 0.07  | -0.13 | -0.04  |
| TCGA-EJ-5506 | TRUE     | -0.57 | 0.69  | 0.56      | -0.05 | -0.14 | FALSE    | -0.45       | -0.57     | -0.04 | -0.01 | -0.03  |



| Patient      | Response | TIDE  | IFNG  | MSI Score | CD274 | CD8   | CTL.flag | Dysfunction | Exclusion | MDSC  | CAF   | TAM M2 |
|--------------|----------|-------|-------|-----------|-------|-------|----------|-------------|-----------|-------|-------|--------|
| TCGA-CH-5767 | TRUE     | -0.57 | -0.7  | 0.87      | 0.21  | -0.73 | FALSE    | -0.89       | -0.57     | -0.03 | -0.04 | -0.02  |
| TCGA-EJ-7784 | TRUE     | -0.58 | 0.45  | 0.52      | -0.24 | -0.32 | FALSE    | -0.91       | -0.58     | 0.02  | -0.13 | 0.02   |
| TCGA-VN-A88Q | TRUE     | -0.59 | -0.49 | 0.38      | -0.31 | -0.41 | FALSE    | -0.48       | -0.59     | 0.02  | -0.1  | -0.01  |
| TCGA-M7-A724 | TRUE     | -0.6  | -1.37 | 0.96      | -0.06 | -0.99 | FALSE    | -0.72       | -0.6      | 0.09  | -0.26 | 0.06   |
| TCGA-V1-A8WL | TRUE     | -0.6  | 0.7   | 0.49      | 0.18  | 0.43  | FALSE    | 0.67        | -0.6      | -0.06 | 0.03  | -0.06  |
| TCGA-EJ-7797 | TRUE     | -0.6  | 0.49  | 0.34      | -0.03 | 0.08  | FALSE    | -0.22       | -0.6      | -0.01 | -0.05 | -0.03  |
| TCGA-G9-6499 | TRUE     | -0.6  | -0.43 | 0.78      | 0.46  | 0.32  | FALSE    | -0.45       | -0.6      | 0     | -0.07 | -0.03  |
| TCGA-M7-A725 | TRUE     | -0.61 | 0.78  | 0.45      | -0.04 | -0.72 | FALSE    | -0.88       | -0.61     | 0.06  | -0.1  | -0.05  |
| TCGA-G9-A9S7 | TRUE     | -0.62 | 0.06  | 0.68      | -0.27 | 0.27  | TRUE     | -0.62       | -0.47     | 0.06  | -0.19 | 0.04   |
| TCGA-CH-5768 | TRUE     | -0.63 | -0.11 | 0.63      | -0.04 | -0.09 | FALSE    | -1.46       | -0.63     | 0.02  | -0.13 | 0.02   |
| TCGA-EJ-A65J | TRUE     | -0.63 | 0.21  | 0.6       | -0.04 | -0.84 | FALSE    | -0.65       | -0.63     | -0.06 | -0.04 | 0      |
| TCGA-KC-A7FD | TRUE     | -0.64 | -0.39 | 0.63      | 0.18  | -0.42 | FALSE    | -0.97       | -0.64     | 0.05  | -0.14 | -0.02  |
| TCGA-VN-A88N | TRUE     | -0.66 | 0.14  | 0.78      | -0.32 | -0.07 | FALSE    | -0.69       | -0.66     | 0.02  | -0.15 | 0.03   |
| TCGA-EJ-5516 | TRUE     | -0.67 | 1.59  | 0.41      | 0.4   | 0.14  | TRUE     | -0.67       | -0.3      | -0.07 | 0.1   | -0.06  |
| TCGA-EJ-7123 | TRUE     | -0.68 | -0.6  | 0.6       | 0     | -0.52 | FALSE    | -0.48       | -0.68     | -0.02 | -0.1  | 0.02   |
| TCGA-XK-AAJP | TRUE     | -0.68 | 0.39  | 0.67      | 0.02  | -0.67 | FALSE    | -0.3        | -0.68     | 0     | -0.13 | 0.02   |
| TCGA-J4-AAU2 | TRUE     | -0.68 | -0.18 | 0.78      | 0.04  | 0.05  | FALSE    | 0.12        | -0.68     | -0.02 | -0.09 | 0.01   |
| TCGA-G9-6354 | TRUE     | -0.68 | 0.45  | 0.8       | -0.1  | 0.65  | FALSE    | -0.18       | -0.68     | 0     | -0.14 | 0.02   |
| TCGA-YL-A8S9 | TRUE     | -0.68 | -1.07 | 0.87      | -0.09 | -0.99 | FALSE    | -1.51       | -0.68     | 0.04  | -0.22 | 0.07   |
| TCGA-EJ-5499 | TRUE     | -0.69 | 0.99  | 0.54      | 0.17  | 0.35  | TRUE     | -0.69       | 0.28      | 0.07  | -0.04 | 0.01   |
| TCGA-J4-AATZ | TRUE     | -0.69 | 0.29  | 0.58      | 1.25  | -0.39 | FALSE    | -0.62       | -0.69     | 0.01  | -0.1  | -0.02  |
| TCGA-CH-5764 | TRUE     | -0.69 | 0.74  | 0.49      | 0.13  | 0.8   | TRUE     | -0.69       | -0.65     | -0.02 | -0.03 | -0.04  |
| TCGA-EJ-7218 | TRUE     | -0.71 | 0.3   | 0.74      | 0.12  | -0.89 | FALSE    | 0.17        | -0.71     | -0.02 | -0.12 | 0.03   |
| TCGA-EJ-8468 | TRUE     | -0.71 | 0.15  | 0.42      | 0.12  | 0.07  | FALSE    | 0.16        | -0.71     | -0.13 | 0.08  | -0.05  |
| TCGA-EJ-7781 | TRUE     | -0.72 | 0.01  | 0.37      | -0.04 | 0.01  | FALSE    | -0.04       | -0.72     | -0.08 | 0.01  | -0.03  |
| TCGA-KK-A8IH | TRUE     | -0.72 | 0.71  | 0.3       | -0.28 | -0.63 | FALSE    | 0.08        | -0.72     | 0     | -0.08 | -0.03  |
| TCGA-KK-A6E0 | TRUE     | -0.73 | 0.11  | 0.74      | 0.04  | -0.62 | FALSE    | -0.87       | -0.73     | 0.04  | -0.19 | 0.03   |
| TCGA-EJ-5502 | TRUE     | -0.73 | 0.15  | 0.28      | -0.07 | -0.18 | FALSE    | 0.92        | -0.73     | -0.09 | 0.08  | -0.09  |
| TCGA-HC-7819 | TRUE     | -0.74 | -0.01 | 0.67      | -0.22 | -0.69 | FALSE    | -1.41       | -0.74     | 0.02  | -0.15 | 0.02   |
| TCGA-XJ-A83H | TRUE     | -0.75 | 0.04  | 0.71      | -0.01 | 0.12  | FALSE    | 0.11        | -0.75     | 0.02  | -0.06 | -0.07  |
| TCGA-HC-7077 | TRUE     | -0.75 | 0.14  | 0.79      | -0.24 | -0.24 | FALSE    | -0.95       | -0.75     | 0.04  | -0.17 | 0.01   |
| TCGA-YL-A9WJ | TRUE     | -0.75 | 0     | 0.51      | -0.05 | -0.27 | FALSE    | 0.89        | -0.75     | -0.08 | 0.04  | -0.06  |
| TCGA-XK-AAIW | TRUE     | -0.76 | 1.23  | 0.9       | 0.07  | 2.17  | TRUE     | -0.76       | -0.7      | 0.1   | -0.24 | 0.03   |
| TCGA-J9-A52D | TRUE     | -0.76 | -0.85 | 0.94      | 0.2   | -0.91 | FALSE    | -1.35       | -0.76     | 0.04  | -0.21 | 0.05   |
| TCGA-J4-A67T | TRUE     | -0.76 | 0.35  | 0.5       | 0.62  | 0.27  | FALSE    | 0.3         | -0.76     | -0.03 | 0.04  | -0.11  |
| TCGA-EJ-5522 | TRUE     | -0.77 | 1.08  | 0.41      | 0.23  | 0.3   | TRUE     | -0.77       | -0.38     | -0.05 | 0.01  | -0.01  |
| TCGA-KK-A7AU | TRUE     | -0.79 | 0.17  | 0.67      | -0.07 | -0.13 | FALSE    | -0.7        | -0.79     | 0.05  | -0.22 | 0.03   |
| TCGA-CH-5792 | TRUE     | -0.8  | 0.84  | 0.19      | 0.28  | 0.54  | FALSE    | 1.81        | -0.8      | -0.12 | 0.12  | -0.1   |
| TCGA-KK-A8II | TRUE     | -0.81 | -0.01 | 0.65      | -0.25 | -0.27 | FALSE    | -1.12       | -0.81     | 0.05  | -0.17 | -0.01  |
| TCGA-KK-A8ID | TRUE     | -0.82 | 1.57  | 0.79      | 0.22  | -0.31 | FALSE    | -0.85       | -0.82     | 0.03  | -0.17 | 0.02   |
| TCGA-HC-8258 | TRUE     | -0.82 | 0.18  | 0.66      | 0.19  | -0.03 | FALSE    | 0.87        | -0.82     | -0.04 | -0.05 | -0.04  |
| TCGA-EJ-5507 | TRUE     | -0.83 | 1.96  | 0.35      | 0.53  | 0.19  | TRUE     | -0.83       | -0.49     | -0.01 | -0.04 | -0.02  |
| TCGA-J4-A83M | TRUE     | -0.85 | 0.42  | 0.58      | -0.13 | 0.43  | FALSE    | 0.69        | -0.85     | -0.04 | -0.05 | -0.04  |
| TCGA-J9-A8CN | TRUE     | -0.86 | -0.91 | 0.86      | 0.29  | -0.27 | FALSE    | -0.29       | -0.86     | -0.01 | -0.1  | -0.01  |
| TCGA-HC-8216 | TRUE     | -0.88 | 1.34  | 0.65      | 0.55  | 0.38  | TRUE     | -0.88       | -0.73     | -0.01 | -0.07 | -0.03  |
| TCGA-HC-7820 | TRUE     | -0.88 | 0.58  | 0.62      | -0.02 | 0.33  | FALSE    | -0.37       | -0.88     | -0.03 | -0.12 | 0.01   |
| TCGA-CH-5738 | TRUE     | -0.89 | -0.06 | 0.37      | 0     | 0.12  | FALSE    | 0.45        | -0.89     | -0.13 | 0.11  | -0.1   |
| TCGA-2A-A8VT | TRUE     | -0.89 | 0.62  | 0.26      | -0.02 | 0.38  | FALSE    | -0.34       | -0.89     | 0     | -0.12 | -0.03  |
| TCGA-Y6-A9XI | TRUE     | -0.9  | -0.68 | 0.59      | -0.31 | -0.62 | FALSE    | -0.43       | -0.9      | -0.03 | -0.16 | 0.05   |
| TCGA-HC-8256 | TRUE     | -0.92 | 0.42  | 0.82      | -0.14 | 0.08  | FALSE    | -1.03       | -0.92     | 0     | -0.19 | 0.04   |
| TCGA-WW-A8ZI | TRUE     | -0.93 | 0.22  | 0.59      | 0.31  | -0.17 | FALSE    | -0.46       | -0.93     | -0.04 | -0.12 | 0.02   |
| TCGA-CH-5748 | TRUE     | -0.94 | 0.22  | 0.74      | 0.12  | -0.24 | FALSE    | -1.39       | -0.94     | 0     | -0.14 | 0      |
| TCGA-HC-7818 | TRUE     | -0.94 | -0.05 | 0.42      | -0.18 | -0.11 | FALSE    | 0.17        | -0.94     | -0.07 | 0     | -0.06  |
| TCGA-2A-AAYO | TRUE     | -0.95 | 0.93  | 0.61      | 0.3   | 0.59  | FALSE    | 1.01        | -0.95     | -0.09 | -0.02 | -0.03  |
| TCGA-KC-A4BN | TRUE     | -0.95 | -0.03 | 0.69      | 0.25  | 0.1   | FALSE    | -0.45       | -0.95     | 0.01  | -0.09 | -0.06  |
| TCGA-HC-A6AO | TRUE     | -0.95 | 0.69  | 0.89      | 0.14  | -0.17 | FALSE    | -0.06       | -0.95     | 0.01  | -0.17 | 0      |
| TCGA-HC-8213 | TRUE     | -0.97 | -0.3  | 0.91      | -0.13 | -0.49 | FALSE    | -1.91       | -0.97     | 0     | -0.21 | 0.05   |
| TCGA-CH-5737 | TRUE     | -0.98 | -0.21 | 0.74      | 1.32  | -0.77 | FALSE    | -0.23       | -0.98     | -0.04 | -0.11 | 0      |
| TCGA-CH-5789 | TRUE     | -1.02 | -0.74 | 0.49      | -0.07 | -0.14 | FALSE    | -0.01       | -1.02     | -0.13 | 0.06  | -0.08  |
| TCGA-KK-A6DY | TRUE     | -1.03 | 0.81  | 0.35      | -0.04 | 0.26  | FALSE    | -0.07       | -1.03     | -0.05 | -0.01 | -0.1   |
| TCGA-HC-7080 | TRUE     | -1.03 | -0.13 | 0.65      | 0.26  | -0.93 | FALSE    | -0.12       | -1.03     | 0.01  | -0.2  | 0.02   |
| TCGA-VN-A943 | TRUE     | -1.07 | -0.85 | 0.97      | 1.21  | -0.55 | FALSE    | -1.14       | -1.07     | 0.01  | -0.22 | 0.03   |
| TCGA-XK-AAJA | TRUE     | -1.09 | -0.46 | 0.38      | 0.16  | -0.55 | FALSE    | 0.26        | -1.09     | -0.01 | -0.16 | 0      |
| TCGA-HC-7752 | TRUE     | -1.09 | -1.05 | 0.5       | 0.02  | -0.12 | FALSE    | 1.39        | -1.09     | -0.06 | -0.14 | 0.03   |
| TCGA-CH-5790 | TRUE     | -1.1  | -0.34 | 0.37      | -0.19 | -0.35 | FALSE    | -1.01       | -1.1      | -0.06 | -0.09 | -0.01  |
| TCGA-EJ-A8FS | TRUE     | -1.11 | -0.43 | 0.86      | 0.24  | -0.15 | FALSE    | -0.58       | -1.11     | 0.01  | -0.22 | 0.03   |
| TCGA-2A-A8W1 | TRUE     | -1.14 | -0.41 | 0.94      | 0.09  | -0.49 | FALSE    | -1.49       | -1.14     | 0.02  | -0.22 | 0.02   |
| TCGA-YL-A8SA | TRUE     | -1.19 | 0.66  | 0.6       | -0.13 | -0.65 | FALSE    | -0.43       | -1.19     | -0.01 | -0.14 | -0.03  |
| TCGA-J4-A83J | TRUE     | -1.19 | 0.42  | 0.63      | 0.37  | -0.01 | FALSE    | 0.21        | -1.19     | -0.02 | -0.09 | -0.08  |
| TCGA-V1-A9OF | TRUE     | -1.2  | -0.33 | 0.73      | 0.22  | -0.11 | FALSE    | -0.77       | -1.2      | -0.03 | -0.23 | 0.07   |

| Patient      | Response | TIDE  | IFNG  | MSI Score | CD274 | CD8   | CTL.flag | Dysfunction | Exclusion | MDSC  | CAF   | TAM M2 |
|--------------|----------|-------|-------|-----------|-------|-------|----------|-------------|-----------|-------|-------|--------|
| TCGA-VN-A88O | TRUE     | -1.21 | 0.83  | 0.81      | 0.82  | 0.17  | FALSE    | 0.24        | -1.21     | -0.02 | -0.09 | -0.08  |
| TCGA-CH-5744 | TRUE     | -1.23 | 0.23  | 0.45      | -0.23 | 0.18  | FALSE    | 0.63        | -1.23     | -0.05 | -0.08 | -0.04  |
| TCGA-HC-7078 | TRUE     | -1.24 | -0.15 | 0.38      | 0.12  | -0.15 | FALSE    | 0.55        | -1.24     | -0.06 | -0.1  | -0.02  |
| TCGA-EJ-A7NN | TRUE     | -1.31 | 0.24  | 0.33      | 0.01  | -0.23 | FALSE    | 1           | -1.31     | -0.03 | -0.08 | -0.08  |
| TCGA-FC-A4JI | TRUE     | -1.36 | 0.98  | 0.91      | -0.09 | 0.8   | TRUE     | -1.36       | -0.72     | 0.1   | -0.23 | 0.02   |
| TCGA-HC-7211 | TRUE     | -1.4  | -0.61 | 0.41      | 0.98  | -0.71 | FALSE    | -0.23       | -1.4      | -0.07 | -0.03 | -0.1   |
| TCGA-HC-7075 | TRUE     | -1.55 | 0.6   | 0.86      | 0.07  | -0.48 | FALSE    | -0.36       | -1.55     | -0.06 | -0.15 | -0.03  |
| TCGA-CH-5753 | TRUE     | -1.76 | 1.61  | 0.39      | 0.51  | -0.45 | FALSE    | -0.56       | -1.76     | -0.04 | -0.11 | -0.12  |
